# Supplementary material for: Caesarean section surgical techniques: 3 year follow-up of the CORONIS fractional, factorial, unmasked, randomised controlled trial
Source: PubMed Central journal article supplement (PMC4930950; doi:10.1016/s0140-6736(16)00204-x), 2016-07-02
Supplement: mmc1.pdf [file mmc1.pdf]

# THE LANCET

## Supplementary appendix

This appendix formed part of the original submission and has been peer reviewed. We post it as supplied by the authors.

Supplement to: The CORONIS collaborative group. Caesarean section surgical techniques: 3 year follow-up of the CORONIS fractional, factorial, unmasked, randomised controlled trial. *Lancet* 2016; published online May 4. [http://dx.doi.org/10.1016/S0140-6736\(16\)00204-X](http://dx.doi.org/10.1016/S0140-6736(16)00204-X).

## **Supplementary material**

**This web appendix has been provided by the authors to give readers additional information about their work.**

**Supplement to Caesarean section surgical techniques and long term outcomes: follow-up of the CORONIS trial**

**The CORONIS Trial Collaborative Group**

## Contents

|                                                                  |    |
|------------------------------------------------------------------|----|
| Defining the main comparisons of interest                        | 3  |
| Table S1 Comparisons of interest                                 | 4  |
| Table S2 Settings                                                | 5  |
| Table S3 Deaths by cause                                         | 6  |
| Table S4 Characteristics of women assessed                       | 7  |
| Table S5 Comparability of women included with those not included | 9  |
| Table S6 Abdominal entry                                         | 10 |
| Table S7 Closure of uterus                                       | 11 |
| Table S8 Uterine repair sutures                                  | 12 |
| Table S9 - Table S13 Secondary comparisons of interest           | 13 |
| Table S14 All outcomes by sub-continent and overall              | 23 |
| Table S15 Incidence of all outcomes by region and overall        | 25 |

## Defining the main comparisons of interest

A 2x2x2x2 fractional factorial design is efficient because it can answer a range of questions with a smaller overall sample size than would be necessary if the questions were addressed individually. However, there are concerns about the number of comparisons undertaken when each intervention pair may have different outcomes of interest. For the main trial there was one overall primary outcome for all the intervention pairs. For the follow up study, there were likely to be differences in the impact of the different intervention pairs on a range of long term outcomes. For example, those intervention pairs which were concerned with the uterine scar incision, i.e. single versus double layer closure, or use of chromic catgut versus polyglactin-910, will most likely impact on outcomes associated with integrity of the uterine scar, such as uterine rupture or abnormal placentation. Whereas intervention pair such as closure versus non closure of the peritoneum may be more likely to impact on outcomes associated with intraperitoneal adhesions, such as pelvic pain, dyspareunia and infertility.

All potential outcomes associated with all the different techniques were initially enumerated. At a meeting of the CORONIS follow up study investigators in October 2010, an extensive exercise was undertaken to define which outcomes were most likely to be affected by the five intervention pairs based on the biological plausibility of seeing an impact. It was recognised that there were specific outcomes which were of major interest in evaluating the long term impact of specific intervention pairs, and these were labelled as main comparisons of interest, (M) in table S1. In addition there were outcomes which were less likely or which were less relevant but which were still of interest, and these were labelled as secondary comparisons of interest, (s) in table S1. And there were outcomes which were felt to be irrelevant to specific intervention pairs and these are the empty cells in table S1.

The process by which these comparisons were agreed was one of consensus development over a two day meeting between the clinicians amongst the co-investigator group. Alongside this exercise, a further exercise was undertaken once there was final agreement on the main comparisons of interest, to explore where there may be biologically plausible two-way interactions between intervention pairs focusing exclusively on the main comparisons of interest. It was initially agreed, as it was for the main trial, that no interactions would be explored unless there was evidence of a main effect. However, if there was evidence of a main effect, then biologically plausible interactions would be explored in the analysis.

**Table S1 Comparisons of interest**

| Outcome reference number                          | Outcome                                                                                  | Blunt vs. Sharp | Exterior vs. Intra-abdominal | Single vs. Double | Closure vs. Non-Closure | Catgut vs. PG910 |
|---------------------------------------------------|------------------------------------------------------------------------------------------|-----------------|------------------------------|-------------------|-------------------------|------------------|
| <b>Women's health and mortality</b>               |                                                                                          |                 |                              |                   |                         |                  |
| 1                                                 | i) Pelvic pain                                                                           | s               | s                            | s                 | <b>M</b> <sup>a</sup>   | s <sup>b</sup>   |
|                                                   | ii) Dysmenorrhoea                                                                        | s               | s                            | s                 | s                       | s                |
|                                                   | iii) Deep dyspareunia                                                                    | s               | s                            | s                 | <b>M</b>                | s                |
|                                                   | iv) Urinary symptoms                                                                     | s               | s                            | s                 | s                       | s                |
| 2                                                 | Diagnostic laparoscopy or diagnostic laparotomy - not related to pregnancy               | s               | s                            | s                 | <b>M</b>                | s                |
| 3                                                 | Hysterectomy or tubal/ovarian surgery - not related to pregnancy                         | s               | s                            | s                 | <b>M</b>                | s                |
| 4                                                 | Bladder or bowel damage – not related to pregnancy                                       | s               | s                            | s                 | <b>M</b>                | s                |
| 5                                                 | i) Abdominal hernias                                                                     | <b>M</b>        |                              |                   | s                       |                  |
|                                                   | ii) Bowel obstruction                                                                    | s               | s                            | s                 | <b>M</b>                | s                |
| 6                                                 | Woman's death                                                                            |                 | s                            | <b>M</b>          | s                       | <b>M</b>         |
| <b>Reproductive status</b>                        |                                                                                          |                 |                              |                   |                         |                  |
| 7                                                 | i) Women with no subsequent pregnancy – voluntary                                        | s               |                              |                   | s                       |                  |
|                                                   | ii) Women with no subsequent pregnancy – involuntary                                     | s               | <b>M</b>                     | s                 | <b>M</b>                | s                |
| 8                                                 | Fertility treatments                                                                     | s               | <b>M</b>                     | s                 | <b>M</b>                | s                |
| <b>Subsequent pregnancies</b>                     |                                                                                          |                 |                              |                   |                         |                  |
| 9                                                 | Any subsequent pregnancy                                                                 | s               | s                            | s                 | s                       | s                |
|                                                   | i) Interpregnancy interval                                                               | s               | s                            | s                 | s                       | s                |
|                                                   | ii) Miscarriage                                                                          |                 | s                            | s                 |                         | s                |
|                                                   | iii) Ectopic pregnancy                                                                   |                 | <b>M</b>                     | s                 | <b>M</b>                | s                |
|                                                   | iv) Gestation                                                                            |                 | s                            | s                 |                         | s                |
|                                                   | v) Stillbirth                                                                            |                 | s                            | <b>M</b>          |                         | <b>M</b>         |
|                                                   | vi) Neonatal death                                                                       |                 | s                            | <b>M</b>          |                         | <b>M</b>         |
|                                                   | vii) Mode of delivery                                                                    |                 | s                            | <b>M</b>          |                         | <b>M</b>         |
|                                                   | viii) Other pregnancy complications (composite of a-i)                                   |                 | s                            | <b>M</b>          |                         | <b>M</b>         |
|                                                   | a Uterine rupture                                                                        |                 | s                            | <b>M</b>          |                         | <b>M</b>         |
|                                                   | b Uterine scar dehiscence                                                                |                 | s                            | <b>M</b>          |                         | <b>M</b>         |
|                                                   | c Placenta praevia                                                                       |                 | s                            | <b>M</b>          |                         | <b>M</b>         |
|                                                   | d Morbidly adherent placenta                                                             |                 | s                            | <b>M</b>          |                         | <b>M</b>         |
|                                                   | e Abruptio                                                                               |                 | s                            | <b>M</b>          |                         | <b>M</b>         |
|                                                   | f Postpartum haemorrhage requiring transfusion of >1 unit of whole blood or packed cells |                 | s                            | <b>M</b>          |                         | <b>M</b>         |
|                                                   | g Severe infection within 6 weeks postpartum                                             |                 | s                            | <b>M</b>          |                         | <b>M</b>         |
|                                                   | h Hysterectomy up to 6 weeks postpartum                                                  |                 | s                            | <b>M</b>          |                         | <b>M</b>         |
|                                                   | i Manual removal of placenta                                                             |                 | s                            | <b>M</b>          |                         | <b>M</b>         |
|                                                   | ix) Bladder or bowel damage – at the time of subsequent Caesarean section                | s               | s                            | s                 | s                       | s                |
| <b>CORONIS children – morbidity and mortality</b> |                                                                                          |                 |                              |                   |                         |                  |
| 10                                                | Death or serious morbidity of child                                                      | <b>M</b>        |                              |                   |                         |                  |

<sup>a</sup>M = Main comparison

<sup>b</sup>S = Secondary comparison

## Settings

The CORONIS Trial and Follow-up Study was conducted in seven countries (8 regions) in 19 sites. The sites were a mixture of public and private hospitals, small and large and took both emergency and elective admissions. The numbers of women eligible to be assessed, and the number assessed are shown in Table S2.

**Table S2 Settings**

| Regional Trial Offices                                    | Eligible for follow-up <sup>ab</sup> | HAQs <sup>c</sup> received | Deaths <sup>d</sup> | Total        | %         |
|-----------------------------------------------------------|--------------------------------------|----------------------------|---------------------|--------------|-----------|
| <b>Argentina</b>                                          |                                      |                            |                     |              |           |
| Hospital Dr Jose Maria Cullen                             | 200                                  | 166                        |                     | 166          | 83        |
| Hospital Interzonal General de Agudos Dr Jose Penna       | 505                                  | 390                        | 1                   | 391          | 77        |
| Hospital J.B. Iturraspe                                   | 237                                  | 179                        | 1                   | 180          | 76        |
| Hospital Nacional Profesor Alejandro Posadas              | 431                                  | 323                        | 2                   | 325          | 75        |
| Hospital Regional Dr Ramon Carillo                        | 243                                  | 213                        | 1                   | 214          | 88        |
| <b>Total for Argentina</b>                                | <b>1616</b>                          | <b>1271</b>                | <b>5</b>            | <b>1276</b>  | <b>79</b> |
| <b>Chile</b>                                              |                                      |                            |                     |              |           |
| Pontificia Universidad Católica de Chile Hospital         | 505                                  | 486                        | 0                   | 486          | 96        |
| Sotero Del Rio Hospital                                   | 700                                  | 648                        | 3                   | 651          | 93        |
| <b>Total for Chile</b>                                    | <b>1205</b>                          | <b>1134</b>                | <b>3</b>            | <b>1137</b>  | <b>94</b> |
| <b>Ghana</b>                                              |                                      |                            |                     |              |           |
| Komfo Anokye Teaching Hospital                            | <b>1260</b>                          | <b>1041</b>                | <b>3</b>            | <b>1044</b>  | <b>83</b> |
| <b>India -Delhi</b>                                       |                                      |                            |                     |              |           |
| All India Institute of Medical Sciences (AIIMS)           | 565                                  | 478                        | 6                   | 484          | 86        |
| Lady Hardinge Medical College & Sucheta Kriplani Hospital | 1062                                 | 819                        | 5                   | 824          | 78        |
| Maulana Azad Medical College & Lok Nayak Hospital         | 1027                                 | 729                        | 6                   | 735          | 72        |
| University College of Medical Sciences & GTB Hospital     | 1100                                 | 836                        | 8                   | 844          | 77        |
| <b>Total for Delhi</b>                                    | <b>3754</b>                          | <b>2862</b>                | <b>25</b>           | <b>2887</b>  | <b>77</b> |
| <b>Kenya</b>                                              |                                      |                            |                     |              |           |
| Kenyatta National Hospital                                | <b>1653</b>                          | <b>1446</b>                | <b>14</b>           | <b>1461</b>  | <b>88</b> |
| <b>Pakistan</b>                                           |                                      |                            |                     |              |           |
| Countess of Dufferin Hospital                             | 1493                                 | 1191                       | 4                   | 1195         | 80        |
| Fatima Bai Hospital                                       | 468                                  | 371                        | 3                   | 374          | 80        |
| Liaquat National Hospital                                 | 563                                  | 476                        | 1                   | 477          | 85        |
| <b>Total for Pakistan</b>                                 | <b>2524</b>                          | <b>2038</b>                | <b>8</b>            | <b>2046</b>  | <b>81</b> |
| <b>Sudan</b>                                              |                                      |                            |                     |              |           |
| Omdurman Maternity Hospital                               | 1056                                 | 780                        | 4                   | 784          | 74        |
| Soba University Hospital                                  | 537                                  | 518                        | 2                   | 520          | 97        |
| <b>Total for Sudan</b>                                    | <b>1593</b>                          | <b>1298</b>                | <b>6</b>            | <b>1304</b>  | <b>82</b> |
| <b>India - Vellore</b>                                    |                                      |                            |                     |              |           |
| Christian Medical College Hospital                        | <b>2101</b>                          | <b>2063</b>                | <b>9</b>            | <b>2072</b>  | <b>99</b> |
| <b>Overall</b>                                            | <b>15706</b>                         | <b>13153</b>               | <b>73</b>           | <b>13227</b> | <b>84</b> |

<sup>a</sup> Excludes women known to be dead at six weeks, women randomised in error, women who withdrew consent from main trial, baseline data not received, vaginal deliveries at the time of recruitment to CORONIS.

<sup>b</sup> Includes women eligible to be contacted for follow-up and assessment

<sup>c</sup> HAQ = Health Assessment Questionnaire

<sup>d</sup> Deaths reported during the follow-up study

**Table S3 Deaths by cause**

This table includes all known deaths of women participating in CORONIS from the time of recruitment into the trial until the time that follow-up was achieved.

| Cause                          | Number of deaths |             |            |             |            |            |           |
|--------------------------------|------------------|-------------|------------|-------------|------------|------------|-----------|
|                                | First year       | Second year | Third year | Fourth year | Fifth year | Sixth year | Total     |
| Pregnancy related <sup>a</sup> | 8                | 1           | 1          | 0           | 0          | 1          | 11        |
| Infection <sup>b</sup>         | 8                | 2           | 2          | 2           | 2          | 2          | 18        |
| Cancer                         | 4                | 1           | 0          | 1           | 1          | 0          | 7         |
| Other medical <sup>c</sup>     | 6                | 7           | 7          | 6           | 4          | 0          | 30        |
| Suicide/Accident <sup>d</sup>  | 2                | 3           | 2          | 2           | 1          | 0          | 10        |
| Unknown                        | 5                | 2           | 2          | 3           | 0          | 1          | 13        |
|                                | <b>33</b>        | <b>16</b>   | <b>14</b>  | <b>14</b>   | <b>8</b>   | <b>4</b>   | <b>89</b> |

<sup>a</sup> Includes hypertensive disease, Mendelson's syndrome, haemorrhage, PIH, DIC

<sup>b</sup> Includes HIV/AIDS, Hepatitis C, tuberculosis, H1N1 influenza

<sup>c</sup> Includes epilepsy, stroke, liver failure, diabetes, heart disease, renal failure, Crohns disease, heart disease

<sup>d</sup> Suicide has been included with accidental death, as this is how these deaths are reported in some of these settings

**Table S4 Characteristics of women assessed**

|                                    | Abdominal entry   |                   | Repair of uterus     |                      | Closure of uterus  |                    | Closure of peritoneum |                         | Uterine repair sutures |                    | Total         |
|------------------------------------|-------------------|-------------------|----------------------|----------------------|--------------------|--------------------|-----------------------|-------------------------|------------------------|--------------------|---------------|
|                                    | Blunt<br>N = 3878 | Sharp<br>N = 3873 | Exterior<br>N = 4092 | Intra-ab<br>N = 4136 | Single<br>N = 3709 | Double<br>N = 3702 | Closure<br>N = 4036   | Non-closure<br>N = 4087 | Catgut<br>N = 3974     | PG-910<br>N = 3972 | N = 13153     |
| <b>Region</b>                      |                   |                   |                      |                      |                    |                    |                       |                         |                        |                    |               |
| Argentina                          | 635 (16)          | 636 (16)          | 629 (15)             | 642 (16)             | N/A <sup>a</sup>   | N/A <sup>a</sup>   | 642 (16)              | 629 (15)                | N/A <sup>a</sup>       | N/A <sup>a</sup>   | 1271 (10)     |
| Chile                              | N/A <sup>a</sup>  | N/A <sup>a</sup>  | 567 (14)             | 567 (14)             | 325 (9)            | 323 (9)            | 561 (14)              | 573 (14)                | 246 (6)                | 240 (6)            | 1134 (9)      |
| Ghana                              | 516 (13)          | 525 (14)          | N/A <sup>a</sup>     | N/A <sup>a</sup>     | 510 (14)           | 531 (14)           | N/A <sup>a</sup>      | N/A <sup>a</sup>        | 531 (13)               | 510 (13)           | 1041 (8)      |
| India – Delhi                      | 1016 (26)         | 1010 (26)         | 825 (20)             | 830 (20)             | 1436 (39)          | 1426 (39)          | 1010 (25)             | 1033 (25)               | N/A <sup>a</sup>       | N/A <sup>a</sup>   | 2862 (22)     |
| India – Vellore <sup>b</sup>       | 772 (20)          | 769 (20)          | 261 (6)              | 261 (6)              | N/A <sup>a</sup>   | N/A <sup>a</sup>   | 1028 (25)             | 1035 (25)               | 1033 (26)              | 1030 (26)          | 2063 (16)     |
| Kenya                              | 728 (19)          | 718 (19)          | 726 (18)             | 720 (17)             | N/A <sup>a</sup>   | N/A <sup>a</sup>   | N/A <sup>a</sup>      | N/A <sup>a</sup>        | 724 (18)               | 722 (18)           | 1446 (11)     |
| Pakistan <sup>b</sup>              | 211 (5)           | 215 (6)           | 439 (11)             | 463 (11)             | 777 (21)           | 785 (21)           | 795 (20)              | 817 (20)                | 807 (20)               | 805 (20)           | 2038 (15)     |
| Sudan                              | N/A <sup>a</sup>  | N/A <sup>a</sup>  | 645 (16)             | 653 (16)             | 661 (18)           | 637 (17)           | N/A <sup>a</sup>      | N/A <sup>a</sup>        | 633 (16)               | 665 (17)           | 1298 (10)     |
| <b>Maternal characteristics</b>    |                   |                   |                      |                      |                    |                    |                       |                         |                        |                    |               |
| Mother's age - mean [SD]           | 26.7 [5.2]        | 26.9 [5.3]        | 27.3 [5.7]           | 27.4 [5.7]           | 27.1 [5.4]         | 27.0 [5.4]         | 26.6 [5.2]            | 26.7 [5.3]              | 28.1 [5.3]             | 28.1 [5.4]         | 27.2 [5.4]    |
| Nulliparous <sup>c</sup>           | 1991 (51)         | 1947 (50)         | 1832 (45)            | 1875 (45)            | 1733 (47)          | 1780 (48)          | 1911(47)              | 1955 (48)               | 1735 (44)              | 1733 (44)          | 6164 (47)     |
| Previous CS                        |                   |                   |                      |                      |                    |                    |                       |                         |                        |                    |               |
| None                               | 2776 (72)         | 2781 (72)         | 2689 (66)            | 2708 (65)            | 2524 (68)          | 2496 (67)          | 2567 (64)             | 2589 (63)               | 2517 (63)              | 2489 (63)          | 8712 (66)     |
| One                                | 1102 (28)         | 1092 (28)         | 1403 (34)            | 1428 (35)            | 1185 (32)          | 1206 (33)          | 1469 (36)             | 1498 (37)               | 1457 (37)              | 1483 (37)          | 4441 (34)     |
| Previous CS incision               |                   |                   |                      |                      |                    |                    |                       |                         |                        |                    |               |
| Abdominal transverse               | 1051 (95)         | 1041 (95)         | 1364 (97)            | 1403 (98)            | 1155 (97)          | 1176 (98)          | 1413 (96)             | 1440 (96)               | 1401 (96)              | 1426 (96)          | 4290 (97)     |
| Uterine transverse                 | 1035 (94)         | 1029 (94)         | 1246 (89)            | 1261 (88)            | 1030 (87)          | 1052 (87)          | 1340 (91)             | 1365 (91)               | 1384 (95)              | 1417 (96)          | 4053 (91)     |
| Uterine unknown                    | 62 (6)            | 60 (5)            | 151 (11)             | 160 (11)             | 150 (13)           | 149 (12)           | 125 (9)               | 126 (8)                 | 69 (5)                 | 61 (4)             | 371 (8)       |
| HIV status                         |                   |                   |                      |                      |                    |                    |                       |                         |                        |                    |               |
| Known positive                     | 124 (3)           | 124 (3)           | 104 (3)              | 110 (3)              | 31 (1)             | 22 (1)             | 14 (<1)               | 20 (<1)                 | 115 (3)                | 107 (3)            | 257 (2)       |
| Known negative                     | 2825 (73)         | 2847 (74)         | 2495 (61)            | 2503 (61)            | 1463 (39)          | 1451 (39)          | 2867 (71)             | 2871 (70)               | 2046 (51)              | 2026 (51)          | 7798 (59)     |
| Status unknown                     | 929 (24)          | 902 (23)          | 1493 (36)            | 1523 (37)            | 2215 (60)          | 2229 (60)          | 1155 (29)             | 1196 (29)               | 1813 (46)              | 1839 (46)          | 5098 (39)     |
| Fetal heart beat heard             | 3850 (99)         | 3848 (99)         | 4075 (99)            | 4114 (99)            | 3694 (99)          | 3688 (99)          | 4027 (99)             | 4084 (99)               | 3943 (99)              | 3947 (99)          | 13090 (99)    |
| Planned VBAC <sup>d</sup>          | 142/110 (13)      | 179/1092 (16)     | 147/1403 (11)        | 149/1428 (10)        | 109/1185 (9)       | 131/1206 (11)      | 175/1469 (12)         | 184/1498 (12)           | 149/1457 (10)          | 141/1483 (10)      | 502/4441 (11) |
| Ruptured membranes before delivery | 1444 (37)         | 1422 (37)         | 1146 (28)            | 1138 (28)            | 1036 (28)          | 1027 (28)          | 1239 (31)             | 1297 (32)               | 1193 (30)              | 1178 (30)          | 4040 (31)     |
| Labour prior to CS                 | 1966 (51)         | 1957 (51)         | 1659 (41)            | 1665 (40)            | 1599 (43)          | 1572 (42)          | 1769 (44)             | 1795 (44)               | 1547 (39)              | 1556 (39)          | 5695 (43)     |
| Duration of labour                 |                   |                   |                      |                      |                    |                    |                       |                         |                        |                    |               |
| < 6 hours                          | 651 (33)          | 663 (34)          | 556 (34)             | 548 (33)             | 574 (36)           | 555 (35)           | 705 (40)              | 695 (39)                | 434 (28)               | 412 (26)           | 1931 (34)     |
| 6-12 hours                         | 792 (40)          | 743 (38)          | 724 (44)             | 741 (45)             | 617 (39)           | 602 (38)           | 727 (41)              | 769 (43)                | 608 (39)               | 637 (41)           | 2320 (41)     |
| > 12 hours                         | 298 (15)          | 325 (17)          | 288 (17)             | 256 (15)             | 206 (13)           | 216 (14)           | 305 (17)              | 302 (17)                | 296 (19)               | 289 (19)           | 927 (16)      |
| Duration unknown                   | 225 (11)          | 226 (12)          | 91 (5)               | 120 (7)              | 202 (13)           | 199 (13)           | 32 (2)                | 29 (2)                  | 209 (14)               | 218 (14)           | 517 (9)       |



|                                                                                 |            |            |            |            |            |            |            |            |            |            |            |
|---------------------------------------------------------------------------------|------------|------------|------------|------------|------------|------------|------------|------------|------------|------------|------------|
| Intrapartum fever $\geq 38^{\circ}\text{C}$ any time during labour <sup>e</sup> |            |            |            |            |            |            |            |            |            |            |            |
| Unknown                                                                         | 39 (2)     | 41 (2)     | 30 (2)     | 23 (1)     | 28 (2)     | 35 (2)     | 40 (2)     | 36 (2)     | 42 (3)     | 37 (2)     | 117 (2)    |
|                                                                                 | 40 (2)     | 39 (2)     | 10 (1)     | 10 (1)     | 34 (2)     | 43 (3)     | 3 (<1)     | 4 (<1)     | 45 (3)     | 36 (2)     | 88 (2)     |
| CS undertaken                                                                   |            |            |            |            |            |            |            |            |            |            |            |
| before start of labour                                                          | 1912 (49)  | 1916 (49)  | 2433 (59)  | 2471 (60)  | 2110 (57)  | 2130 (58)  | 2267 (56)  | 2292 (56)  | 2427 (61)  | 2416 (61)  | 7458 (57)  |
| after start of labour                                                           | 1966 (51)  | 1957 (51)  | 1659 (41)  | 1665 (40)  | 1599 (43)  | 1572 (42)  | 1769 (44)  | 1795 (44)  | 1547 (39)  | 1556 (39)  | 5695 (43)  |
| Main indication for CS                                                          |            |            |            |            |            |            |            |            |            |            |            |
| Fetal compromise                                                                | 973 (25)   | 954 (25)   | 799 (20)   | 817 (20)   | 796 (21)   | 799 (22)   | 905 (22)   | 917 (22)   | 778 (20)   | 725 (18)   | 2821 (21)  |
| Failure to progress                                                             | 842 (22)   | 828 (21)   | 841 (21)   | 802 (19)   | 896 (24)   | 855 (23)   | 911 (23)   | 898 (22)   | 877 (22)   | 884 (22)   | 2878 (22)  |
| Obst. complications                                                             | 1287 (33)  | 1301 (34)  | 1317 (32)  | 1384 (33)  | 1321 (36)  | 1322 (36)  | 1215 (30)  | 1246 (30)  | 1217 (31)  | 1245 (31)  | 4285 (33)  |
| Maternal request                                                                | 188 (5)    | 166 (4)    | 220 (5)    | 171 (4)    | 84 (2)     | 89 (2)     | 247 (6)    | 260 (6)    | 278 (7)    | 298 (8)    | 667 (5)    |
| Previous C-section                                                              | 256 (7)    | 278 (7)    | 405 (10)   | 419 (10)   | 194 (5)    | 225 (6)    | 459 (11)   | 445 (11)   | 258 (6)    | 256 (6)    | 1065 (8)   |
| Other                                                                           | 332 (9)    | 346 (9)    | 510 (12)   | 543 (13)   | 418 (11)   | 412 (11)   | 299 (7)    | 321 (8)    | 566 (14)   | 564 (14)   | 1437 (11)  |
| Anaesthetic used for CS                                                         |            |            |            |            |            |            |            |            |            |            |            |
| Regional                                                                        |            |            |            |            |            |            |            |            |            |            |            |
| General                                                                         | 3364 (87)  | 3371 (87)  | 3695 (90)  | 3745 (91)  | 3490 (94)  | 3466 (94)  | 3881 (96)  | 3930 (96)  | 3417 (86)  | 3434 (86)  | 11931 (91) |
|                                                                                 | 514 (13)   | 502 (13)   | 397 (10)   | 391 (9)    | 219 (6)    | 236 (6)    | 155 (4)    | 157 (4)    | 557 (14)   | 538 (14)   | 1222 (9)   |
| Gestational age at birth <sup>f</sup>                                           |            |            |            |            |            |            |            |            |            |            |            |
| <32                                                                             |            |            |            |            |            |            |            |            |            |            |            |
| 32-36                                                                           | 57 (1)     | 53 (1)     | 42 (1)     | 46 (1)     | 29 (1)     | 37 (1)     | 49 (1)     | 47 (1)     | 36 (1)     | 51 (1)     | 149 (1)    |
| 37-41                                                                           | 514 (13)   | 548 (14)   | 452 (11)   | 443 (11)   | 571 (15)   | 540 (15)   | 608 (15)   | 628 (15)   | 442 (11)   | 471 (12)   | 1739 (13)  |
| > 41                                                                            | 3198 (82)  | 3172 (82)  | 3544 (87)  | 3568 (86)  | 3014       | 3020 (82)  | 3357 (83)  | 3378 (83)  | 3395 (85)  | 3342 (84)  | 10996 (84) |
|                                                                                 | 89 (2)     | 90 (2)     | 49 (1)     | 67 (2)     | 81 (2)     | 92 (2)     | 21 (1)     | 32 (1)     | 87 (2)     | 94 (2)     | 234 (2)    |
| <b>Associated information</b>                                                   |            |            |            |            |            |            |            |            |            |            |            |
| Time from trial entry to surgery (mins)-Med {IQR}                               | 29 {17-54} | 29 {17-51} | 33 {18-74} | 32 {17-74} | 28 {14-59} | 28 {14-58} | 29 {16-59} | 29 {16-61} | 28 {15-55} | 28 {16-56} | 29 {16-60} |
| > 4 hours <sup>g</sup>                                                          | 152 (4)    | 112 (3)    | 235 (6)    | 243 (6)    | 185 (5)    | 195 (5)    | 208 (5)    | 207 (5)    | 106 (3)    | 133 (3)    | 592 (5)    |
| Surgeon's experience (yrs) - Median {IQR}                                       | 5 {4-8}    | 5 {4-8}    | 7 {4-13}   | 7 {4-13}   | 8 {5-14}   | 8 {5-14}   | 6 {4-12}   | 6 {4-12}   | 7 {4-13}   | 7 {4-13}   | 6 {4-12}   |
| <5                                                                              | 1493 (39)  | 1491 (39)  | 1255 (31)  | 1273 (31)  | 814 (22)   | 819 (22)   | 1331 (33)  | 1362 (33)  | 1072 (27)  | 1072 (27)  | 3994 (30)  |
| 5 to 10                                                                         | 1676 (43)  | 1652 (43)  | 1349 (33)  | 1391 (34)  | 1290 (35)  | 1304 (35)  | 1430 (35)  | 1426 (35)  | 1384 (35)  | 1363 (34)  | 4755 (36)  |
| >10                                                                             | 691 (18)   | 703 (18)   | 1468 (36)  | 1454 (35)  | 1580 (43)  | 1559 (42)  | 1273 (32)  | 1294 (32)  | 1518 (38)  | 1537 (39)  | 4359 (33)  |

<sup>a</sup> Intervention pairs not assigned in these regions.

<sup>b</sup> Some sites within these regions switched intervention pairs.

<sup>c</sup> Nulliparous women are women with no previous births. A previous birth is a live or stillbirth of estimated gestational age > 24 weeks (or > 28 weeks depending on country-specific definitions) regardless of previous mode of delivery or multiple pregnancy (multiple pregnancy counts as one birth).

<sup>d</sup> VBAC - Vaginal Birth After Caesarean section, described in the main trial as 'trial of scar'.

<sup>e</sup> Denominator is women with labour diagnosed before CS.

<sup>f</sup> Completed weeks.

<sup>g</sup> In some sites planned elective CS were randomised the evening before surgery.

**Table S5 Comparability of women included in the analysis with those not included**

|                                                        | <b>Included</b>      | <b>Not included</b> | <b>p-value</b> |
|--------------------------------------------------------|----------------------|---------------------|----------------|
| <b>Population – women assessed</b>                     | <b>13153</b>         | <b>2570</b>         |                |
| Mother's age – mean [sd]                               | 27·2 [5·4]           | 26·0 [5·4]          | <0·001         |
| Nulliparous                                            | 6164 / 13153 (46·9%) | 1220 / 2570 (47·5%) | 0·57           |
| 1 previous caesarean section                           | 4441 / 13153 (33·8%) | 722 / 2570 (28·1)   | <0·001         |
| Caesarean section before start of labour               | 7458 / 13153 (56·7%) | 1281 / 2570 (49·8)  | <0·001         |
| Short-term primary outcome <sup>a</sup>                | 1227 / 13153 (9·3%)  | 240 / 2568 (9·3%)   | 0·98           |
| Still birth or death of CORONIS baby by 6 weeks of age | 412 / 13053 (3·2%)   | 115 / 2389 (4·8%)   | <0·001         |

<sup>a</sup> A woman may have more than one component but is included only once in the primary outcome. Primary outcome defined as death or maternal infectious morbidity or further operative procedures or blood transfusion (>1 unit of whole blood or packed cells).

**Table S6**                      **Abdominal entry**

Secondary analysis, including stillbirths with death or serious morbidity (see Table 2 in main paper)

| <b>Outcome</b>                                                                             | <b>Blunt</b>      | <b>Sharp</b>      | <b>Adjusted RR (95% CI)</b> |
|--------------------------------------------------------------------------------------------|-------------------|-------------------|-----------------------------|
| <i>CORONIS</i> child(ren)<br><b>Denominator –children of women eligible to be assessed</b> | <b>4779</b>       | <b>4817</b>       |                             |
| Known stillbirths, deaths or serious morbidity of <i>CORONIS</i> child(ren) <sup>a</sup>   | 298 / 4779 (6.2%) | 294 / 4817 (6.1%) | 0.2 (0.87 to 1.19)          |

<sup>a</sup> Includes stillbirths

**Table S7 Closure of uterus**

Secondary analysis where the denominator is all women assessed, not only those with a subsequent viable pregnancy (see Table 4 in main paper).

|                                                                                                     | Single              | Double              | Adjusted risk ratio (95% CI) |
|-----------------------------------------------------------------------------------------------------|---------------------|---------------------|------------------------------|
| <i>Subsequent pregnancies</i>                                                                       |                     |                     |                              |
| <b>Denominator – babies of women assessed</b>                                                       | <b>3728</b>         | <b>3724</b>         |                              |
| Stillbirth <sup>a</sup>                                                                             | 34 / 3712 (0.9%)    | 28 / 3709 (0.8%)    | 1.21 (0.74 to 2.00)          |
| Neonatal death <sup>ab</sup>                                                                        | 32 / 3677 (0.9%)    | 34 / 3679 (0.9%)    | 0.94 (0.58 to 1.53)          |
| Mode of delivery <sup>a</sup><br>All caesarean sections                                             | 1312 / 3712 (35.3%) | 1353 / 3709 (36.5%) | 0.97 (0.91 to 1.03)          |
| <b>Denominator – women assessed</b>                                                                 | <b>3709</b>         | <b>3702</b>         |                              |
| Other pregnancy complications – composite <sup>ac</sup>                                             | 38 / 3691 (1.0%)    | 32 / 3686 (0.9%)    | 1.19 (0.74 to 1.89)          |
| Uterine rupture <sup>a</sup>                                                                        | 1 / 3692 (0.03%)    | 2 / 3687 (0.05%)    | 0.50 (0.04 to 5.46)          |
| Uterine scar dehiscence <sup>a</sup>                                                                | 4 / 3691 (0.11%)    | 2 / 3687 (0.05%)    | 1.99 (0.37 to 10.88)         |
| Placenta praevia <sup>a</sup>                                                                       | 5 / 3691 (0.1%)     | 4 / 3687 (0.1%)     | 1.25 (0.34 to 4.65)          |
| Morbidly adherent placenta <sup>a</sup>                                                             | 0 / 3691 (0.00%)    | 2 / 3687 (0.05%)    | -                            |
| Abruption <sup>a</sup>                                                                              | 6 / 3692 (0.2%)     | 4 / 3687 (0.1%)     | 1.49 (0.42 to 5.27)          |
| Postpartum haemorrhage requiring transfusion of >1 unit of whole blood or packed cells <sup>a</sup> | 8 / 3692 (0.2%)     | 7 / 3687 (0.2%)     | 1.14 (0.41 to 3.15)          |
| Severe infection within 6 weeks postpartum <sup>a</sup>                                             | 14 / 3692 (0.4%)    | 15 / 3686 (0.4%)    | 0.93 (0.45 to 1.93)          |
| Hysterectomy up to 6 weeks postpartum <sup>a</sup>                                                  | 1 / 3692 (0.03%)    | 1 / 3687 (0.03%)    | 1.00 (0.06 to 16.04)         |
| Manual removal of placenta <sup>a</sup>                                                             | 4 / 3692 (0.1%)     | 0 / 3687 (0.0%)     | -                            |

<sup>a</sup> For the birth following the CORONIS birth.

<sup>b</sup> Excludes stillbirths.

<sup>c</sup> Includes: uterine rupture, uterine scar dehiscence, placenta praevia, morbidly adherent placenta, abruption postpartum haemorrhage requiring transfusion, severe infection within 6 weeks, postpartum hysterectomy up to 6 weeks postpartum, manual removal of placenta.

**Table S8 Uterine repair sutures**

Secondary analysis where the denominator is all women assessed, not only those with a subsequent viable pregnancy (see Table 6 in main paper)

| Outcome                                                                                                   | Catgut              | PG-910              | Adjusted risk ratio (95% CI) |
|-----------------------------------------------------------------------------------------------------------|---------------------|---------------------|------------------------------|
| <i>Subsequent pregnancies</i>                                                                             |                     |                     |                              |
| <b>Denominator – babies of women assessed</b>                                                             | <b>3999</b>         | <b>3994</b>         |                              |
| Stillbirth <sup>a</sup>                                                                                   | 43 / 3982 (1.1%)    | 33 / 3985 (0.8%)    | 1.30 (0.83 to 2.04)          |
| Neonatal death <sup>ab</sup>                                                                              | 27 / 3939 (0.7%)    | 28 / 3949 (0.7%)    | 0.97 (0.57 to 1.64)          |
| Mode of delivery <sup>a</sup><br>All caesarean sections                                                   | 1472 / 3981 (37.0%) | 1448 / 3985 (36.3%) | 1.01 (0.96 to 1.08)          |
| <b>Denominator – women assessed</b>                                                                       | <b>3974</b>         | <b>3972</b>         |                              |
| Other pregnancy complications – composite <sup>ac</sup>                                                   | 42 / 3956 (1.1%)    | 35 / 3961 (0.9%)    | 1.20 (0.77 to 1.88)          |
| Uterine rupture <sup>a</sup>                                                                              | 3 / 3956 (0.08%)    | 1 / 3962 (0.03%)    | 3.01 (0.31 to 28.96)         |
| Uterine scar dehiscence <sup>a</sup>                                                                      | 2 / 3956 (0.05%)    | 3 / 3961 (0.08%)    | 0.67 (0.11 to 4.01)          |
| Placenta praevia <sup>a</sup>                                                                             | 8 / 3956 (0.2%)     | 8 / 3961 (0.2%)     | 1.01 (0.38 to 2.68)          |
| Morbidly adherent placenta <sup>a</sup>                                                                   | 2 / 3956 (0.05%)    | 3 / 3961 (0.08%)    | 0.67 (0.11 to 4.01)          |
| Abruption <sup>a</sup>                                                                                    | 6 / 3956 (0.2%)     | 2 / 3962 (0.1%)     | 2.99 (0.60 to 14.80)         |
| Postpartum haemorrhage<br>requiring transfusion of >1 unit<br>of whole blood or packed cells <sup>a</sup> | 8 / 3956 (0.2%)     | 7 / 3962 (0.2%)     | 1.14 (0.42 to 3.16)          |
| Severe infection within 6<br>weeks postpartum <sup>a</sup>                                                | 16 / 3956 (0.4%)    | 9 / 3962 (0.2%)     | 1.77 (0.78 to 4.00)          |
| Hysterectomy up to 6 weeks<br>postpartum <sup>a</sup>                                                     | 1 / 3957 (0.03%)    | 2 / 3962 (0.05%)    | 0.50 (0.05 to 5.56)          |
| Manual removal of placenta <sup>a</sup>                                                                   | 5 / 3957 (0.1%)     | 7 / 3962 (0.2%)     | 0.71 (0.23 to 2.24)          |

<sup>a</sup> For the birth following the CORONIS birth.

<sup>b</sup> Excludes stillbirths.

<sup>c</sup> Includes: uterine rupture, uterine scar dehiscence, placenta praevia, morbidly adherent placenta, abruption, postpartum haemorrhage requiring transfusion, severe infection within 6 weeks, postpartum hysterectomy up to 6 weeks postpartum, manual removal of placenta.

Tables S9 to S12 Secondary comparisons of interest by allocation

Table S9 Abdominal entry

| Outcome                                                 | Blunt               | Sharp               | Adjusted risk ratio (99% CI) |
|---------------------------------------------------------|---------------------|---------------------|------------------------------|
| <i>Women's health</i>                                   |                     |                     |                              |
| <b>Denominator – women assessed</b>                     | <b>3878</b>         | <b>3873</b>         |                              |
| Pelvic pain <sup>a</sup>                                | 156 / 3878 (4.0%)   | 136 / 3873 (3.5%)   | 1.14 (0.85 to 1.54)          |
| Dysmenorrhoea <sup>a</sup>                              | 179 / 3878 (4.6%)   | 176 / 3873 (4.5%)   | 1.02 (0.78 to 1.33)          |
| Deep dyspareunia <sup>a</sup>                           | 118 / 3878 (3.0%)   | 112 / 3873 (2.9%)   | 1.05 (0.75 to 1.47)          |
| Urinary symptoms <sup>a,b</sup>                         | 39 / 3878 (1.0%)    | 35 / 3873 (1.0%)    | 1.11 (0.61 to 2.02)          |
| Diagnostic laparoscopy/laparotomy <sup>c</sup>          | 0 / 3878 (0.0%)     | 3 / 3871 (0.08%)    | -                            |
| Hysterectomy or tubal/ovarian surgery <sup>c</sup>      | 9 / 3878 (0.2%)     | 10 / 3873 (0.3%)    | 0.91 (0.28 to 2.97)          |
| Bladder or bowel damage following surgery <sup>cd</sup> | 0 / 75 (0.0%)       | 1 / 64 (1.6%)       | -                            |
| Bowel obstruction <sup>c</sup>                          | 0 / 3878 (0.0%)     | 3 / 3873 (0.08%)    | -                            |
| <i>Reproductive status</i>                              |                     |                     |                              |
| <b>Denominator - Women with no subsequent pregnancy</b> | <b>2266</b>         | <b>2236</b>         |                              |
| Voluntary infertility                                   | 2144 / 2266 (94.6%) | 2099 / 2236 (94.0%) | 1.00 (0.99 to 1.03)          |
| <b>Denominator – women assessed</b>                     | <b>3878</b>         | <b>3873</b>         |                              |
| Voluntary infertility                                   | 2144 / 3878 (55.3%) | 2099 / 3873 (54.2%) | 1.02 (0.97 to 1.07)          |
| Involuntary infertility                                 | 98 / 3878 (2.5%)    | 116 / 3873 (3.0%)   | 0.86 (0.10 to 1.21)          |
| Use of fertility treatments                             | 12 / 3877 (0.3%)    | 14 / 3873 (0.4%)    | 0.86 (0.31 to 2.35)          |

**Table S9 continued**

| Outcome                                                       | Blunt               | Sharp               | Adjusted risk ratio or hazards ratio (HR) (99% CI) |
|---------------------------------------------------------------|---------------------|---------------------|----------------------------------------------------|
| <i>Subsequent pregnancies</i>                                 |                     |                     |                                                    |
| <b>Denominator – women assessed</b>                           | <b>3878</b>         | <b>3873</b>         |                                                    |
| Any subsequent pregnancy                                      | 1612 / 3878 (41.6%) | 1637 / 3873 (42.3%) | 0.99 (0.92 to 1.05)                                |
| <b>Denominator – women with a subsequent pregnancy</b>        | <b>1612</b>         | <b>1637</b>         |                                                    |
| Interpregnancy interval (months) <sup>f</sup>                 |                     |                     | HR                                                 |
| Mean [sd]                                                     | 30.2 [12.88]        | 30.5 [12.46]        | 1.00 (0.92 to 1.10)                                |
| Median {IQR}                                                  | 28.7 {20.5 to 38.0} | 29.5 {21.3 to 38.3} |                                                    |
| <b>Denominator - women with a subsequent viable pregnancy</b> | <b>1367</b>         | <b>1396</b>         |                                                    |
| Bladder or bowel damage <sup>l</sup>                          | 1 / 1105 (0.1%)     | 1 / 1132 (0.1%)     | 1.02 (0.03 to 39.07)                               |
| <b>Denominator - women assessed</b>                           | <b>3878</b>         | <b>3873</b>         |                                                    |
| Bladder or bowel damage <sup>l</sup>                          | 1 / 3595 (0.03%)    | 1 / 3592 (0.03%)    | 1.00 (0.03 to 38.15)                               |

<sup>a</sup> Following the CORONIS birth and before any subsequent pregnancy, any new onset or worsening.

<sup>b</sup> Urinary symptoms of poor stream and/or frequency which did not respond to antibiotics.

<sup>c</sup> Not related to pregnancy.

<sup>d</sup> In those women who have had surgery excluding diagnostic laparoscopy and diagnostic laparotomy.

<sup>e</sup> Following the CORONIS birth any new onset.

<sup>f</sup> From the CORONIS birth to the end of the subsequent pregnancy (regardless of loss or birth).

<sup>g</sup> Of the first viable pregnancy (gestational age > 24 or >28 weeks depending on country specific definition).

<sup>h</sup> For the birth following the CORONIS birth.

<sup>i</sup> Includes: uterine rupture, uterine scar dehiscence, placenta praevia, morbidly adherent placenta, abruption, postpartum haemorrhage requiring transfusion, severe infection within 6 weeks, postpartum hysterectomy up to 6 weeks postpartum, manual removal of placenta.

<sup>j</sup> At the time of subsequent Caesarean section.

**Table S10 Repair of uterus**

| <b>Outcome</b>                                         | <b>Exterior</b>     | <b>Intra-ab</b>     | <b>Adjusted risk ratio or hazards ratio (HR) (99% CI)</b> |
|--------------------------------------------------------|---------------------|---------------------|-----------------------------------------------------------|
| <i>Women's health</i>                                  |                     |                     |                                                           |
| <b>Denominator – women assessed</b>                    | <b>4092</b>         | <b>4136</b>         |                                                           |
| Pelvic pain <sup>a</sup>                               | 223 / 4092 (5.5%)   | 234 / 4136 (5.7%)   | 0.97 (0.76 to 1.22)                                       |
| Dysmenorrhoea <sup>a</sup>                             | 246 / 4092 (6.0%)   | 274 / 4136 (6.6%)   | 0.91 (0.73 to 1.13)                                       |
| Deep dyspareunia <sup>a</sup>                          | 156 / 4092 (3.8%)   | 173 / 4136 (4.2%)   | 0.91 (0.69 to 1.20)                                       |
| Urinary symptoms <sup>a,b</sup>                        | 42 / 4092 (1.0%)    | 55 / 4136 (1.3%)    | 0.77 (0.46 to 1.30)                                       |
| Diagnostic laparoscopy/laparotomy <sup>c</sup>         | 1 / 4092 (0.02%)    | 6 / 4136 (0.15%)    | 0.17 (0.01 to 2.73)                                       |
| Hysterectomy or tubal/ovarian surgery <sup>c</sup>     | 7 / 4092 (0.2%)     | 13 / 4136 (0.3%)    | 0.54 (0.16 to 1.82)                                       |
| Bladder or bowel damage <sup>cd</sup>                  | 0 / 89 (0.0%)       | 1 / 98 (1.02%)      | -                                                         |
| Bowel obstruction <sup>c</sup>                         | 3 / 4092 (0.07%)    | 2 / 4136 (0.05%)    | 1.51 (0.14 to 15.88)                                      |
| <b>Denominator – women eligible to be assessed</b>     | <b>4867</b>         | <b>4862</b>         |                                                           |
| Woman's death                                          | 26 / 4867 (0.5%)    | 23 / 4862 (0.5%)    | 1.13 (0.54 to 2.36)                                       |
| <i>Subsequent pregnancies</i>                          |                     |                     |                                                           |
| <b>Denominator – women assessed</b>                    | <b>4092</b>         | <b>4136</b>         |                                                           |
| Any subsequent pregnancy                               | 1653 / 4092 (40.4%) | 1656 / 4136 (40.0%) | 1.00 (0.94 to 1.08)                                       |
| <b>Denominator – women with a subsequent pregnancy</b> | <b>1653</b>         | <b>1656</b>         |                                                           |
| Interpregnancy interval (months) <sup>f</sup>          |                     |                     | HR                                                        |
| Mean [sd]                                              | 29.3 [11.8]         | 29.6 [12.0]         |                                                           |
| Median {IQR}                                           | 28.2 {20.5 to 36.4} | 28.8 {20.6 to 37.1} | 1.04 (0.95 to 1.13)                                       |
| Miscarriage                                            | 205 / 1627 (12.6%)  | 204 / 1632 (12.5%)  | 1.00 (0.80 to 1.28)                                       |



**Table S10 continued**

| <b>Outcome</b>                                                                                      | <b>Exterior</b>     | <b>Intra-ab</b>     | <b>Adjusted risk ratio or mean difference (MD) (99% CI)</b> |
|-----------------------------------------------------------------------------------------------------|---------------------|---------------------|-------------------------------------------------------------|
| <b>Denominator - women with a subsequent viable pregnancy</b>                                       | <b>1407</b>         | <b>1413</b>         |                                                             |
| Gestation at delivery (completed wks) <sup>g</sup>                                                  |                     |                     | MD                                                          |
| Mean [sd]                                                                                           | 38.3 [1.5]          | 38.3 [1.6]          | -0.06 (-0.21 to 0.09)                                       |
| Median {IQR}                                                                                        | 38.6 {38.0 to 38.6} | 38.6 {38.0 to 39.0} |                                                             |
| <b>Denominator – babies of women with a subsequent viable pregnancy</b>                             | <b>1423</b>         | <b>1425</b>         |                                                             |
| Stillbirth <sup>h</sup>                                                                             | 23 / 1423 (1.6%)    | 20 / 1425 (1.4%)    | 1.15 (0.52 to 2.50)                                         |
| Neonatal death <sup>i</sup>                                                                         | 25 / 1400 (1.8%)    | 23 / 1405 (1.6%)    | 1.10 (0.52 to 2.30)                                         |
| Mode of delivery <sup>h</sup>                                                                       |                     |                     |                                                             |
| Non-instrumental vaginal                                                                            | 212/1423 (14.9%)    | 206/1425 (14.5%)    |                                                             |
| Instrumental vaginal                                                                                | 6/1423 (0.4%)       | 6/1425 (0.4%)       |                                                             |
| Pre-labour caesarean section                                                                        | 941/1423 (66.2%)    | 957/1425 (67.2%)    |                                                             |
| In labour caesarean section                                                                         | 263/1423 (18.5%)    | 256/1425 (17.9%)    |                                                             |
| All caesarean sections                                                                              | 1204 / 1422 (84.7%) | 1213 / 1425 (85.1%) | 0.99 (0.95 to 1.03)                                         |
| <b>Denominator - women with a subsequent viable pregnancy</b>                                       | <b>1407</b>         | <b>1413</b>         |                                                             |
| Other pregnancy complications – composite <sup>hi</sup>                                             | 38 / 1407 (2.7%)    | 50 / 1410 (3.5%)    | 0.80 (0.44 to 1.32)                                         |
| Uterine rupture <sup>h</sup>                                                                        | 1 / 1407 (0.07%)    | 1 / 1412 (0.07%)    | 0.97 (0.03 to 36.8)                                         |
| Uterine scar dehiscence <sup>h</sup>                                                                | 4 / 1407 (0.3%)     | 10 / 1412 (0.7%)    | 1.01 (0.20 to 6.22)                                         |
| Placenta praevia <sup>h</sup>                                                                       | 4 / 1407 (0.3%)     | 10 / 1412 (0.7%)    | 0.40 (0.09 to 1.84)                                         |
| Morbidly adherent placenta <sup>h</sup>                                                             | 0 / 1407(0.0%)      | 4 / 1412 (0.3%)     | -                                                           |
| Abruptio <sup>h</sup>                                                                               | 5 / 1407 (0.4%)     | 4 / 1412 (0.3%)     | 1.25 (0.22 to 7.00)                                         |
| Postpartum haemorrhage requiring transfusion of >1 unit of whole blood or packed cells <sup>h</sup> | 7 / 1407 (0.5%)     | 9 / 1412 (0.6%)     | 0.75 (0.20 to 2.73)                                         |
| Severe infection within 6 weeks postpartum <sup>h</sup>                                             | 17 / 1407 (1.2%)    | 14 / 1410 (1.0%)    | 1.21 (0.50 to 3.06)                                         |

**Table S10 continued**

| Outcome                                                                                             | Exterior           | Intra-ab            | Adjusted risk ratio or mean difference (MD) (99% CI) |
|-----------------------------------------------------------------------------------------------------|--------------------|---------------------|------------------------------------------------------|
| Hysterectomy up to 6 weeks postpartum <sup>h</sup>                                                  | 1 / 1407 (0.1%)    | 3 / 1413 (0.2%)     | 0.34 (0.02 to 6.60)                                  |
| Manual removal of placenta <sup>h</sup>                                                             | 3 / 1407 (0.2%)    | 11 / 1413 (0.8%)    | 0.28 (0.05 to 1.5)                                   |
| Bladder or bowel damage <sup>j</sup>                                                                | 0 / 1190 (0.0%)    | 1 / 1203 (0.1%)     | -                                                    |
| <b>Denominator – babies of women assessed</b>                                                       | <b>4082</b>        | <b>4124</b>         |                                                      |
| Stillbirth <sup>h</sup>                                                                             | 23 / 4082 (0.6%)   | 20 / 4124 (0.5%)    | 1.16 ( 0.53 to 2.55)                                 |
| Neonatal death <sup>i</sup>                                                                         | 25 / 4059 (0.6%)   | 23 / 4104 (0.6%)    | 1.10 ( 0.52 to 2.31)                                 |
| Mode of delivery <sup>h</sup><br>All caesarean sections                                             | 1204 /4081 (29.5%) | 1213 / 4124 (29.4%) | 1.00 (0.92 to 1.10)                                  |
| <b>Denominator - women assessed</b>                                                                 | <b>4092</b>        | <b>4136</b>         |                                                      |
| Other pregnancy complications - composite <sup>hi</sup>                                             | 38 / 4066 (0.9%)   | 50 / 4109 (1.2%)    | 0.77 (0.44 to 1.33)                                  |
| Uterine rupture <sup>h</sup>                                                                        | 1 / 4066 (0.02%)   | 1 / 4111(0.02%)     | 1.01 (0.03 to 38.73)                                 |
| Uterine scar dehiscence <sup>h</sup>                                                                | 4 / 4066 (0.1%)    | 4 / 4111 (0.1%)     | 1.01 (0.16 to 6.24)                                  |
| Placenta praevia <sup>h</sup>                                                                       | 4 / 4066 (0.1%)    | 10/ 4111 (0.2%)     | 0.40 (0.10 to 1.86)                                  |
| Morbidly adherent placenta <sup>h</sup>                                                             | 0 / 4066 (0.0%)    | 4 / 4111(0.1%)      | -                                                    |
| Abruption <sup>h</sup>                                                                              | 5 / 4066 (0.1%)    | 4 / 4111 (0.1%)     | 1.3 (0.22 to 7.10)                                   |
| Postpartum haemorrhage requiring transfusion of >1 unit of whole blood or packed cells <sup>h</sup> | 7 / 4066 (0.02%)   | 9 / 4111 (0.02%)    | 0.80 (0.22 to 2.90)                                  |
| Severe infection within 6 weeks postpartum <sup>h</sup>                                             | 17 / 4066 (0.4%)   | 14 / 4109 (0.3%)    | 1.22 (0.50 to 3.10)                                  |
| Hysterectomy up to 6 weeks postpartum <sup>h</sup>                                                  | 1 / 4066 (0.02%)   | 3 /4112 (0.07%)     | 0.34 (0.02 to 6.60)                                  |
| Manual removal of placenta <sup>h</sup>                                                             | 3 / 4066 (0.1%)    | 11 / 4111 (0.3%)    | 0.30 (0.51 to 1.50)                                  |
| Bladder or bowel damage <sup>j</sup>                                                                | 0 / 3849 (0.00%)   | 1 / 3902 (0.03%)    | -                                                    |

<sup>a</sup> Following the CORONIS birth and before any subsequent pregnancy, any new onset or worsening.

<sup>b</sup> Urinary symptoms of poor stream and/or frequency which did not respond to antibiotics.

<sup>c</sup> Not related to pregnancy.

<sup>d</sup> In those women who have had surgery excluding diagnostic laparoscopy and diagnostic laparotomy.

<sup>e</sup> Following the CORONIS birth any new onset.

<sup>f</sup> From the CORONIS birth to the end of the subsequent pregnancy (regardless of loss or birth.)

<sup>g</sup> Of the first viable pregnancy (gestational age > 24 or >28 weeks depending on country specific definition.

<sup>h</sup> For the birth following the CORONIS birth.

<sup>i</sup> Includes: uterine rupture, uterine scar dehiscence, placenta praevia, morbidly adherent placenta, abruption, postpartum haemorrhage requiring transfusion, severe infection within 6 weeks, postpartum hysterectomy up to 6 weeks postpartum, manual removal of placenta.

<sup>j</sup> At the time of subsequent Caesarean section.

Table S11

## Closure of uterus

| Outcome                                                       | Single              | Double              | Adjusted risk ratio, mean difference (MD) or hazards ratio (HR) (99% CI) |
|---------------------------------------------------------------|---------------------|---------------------|--------------------------------------------------------------------------|
| <b>Women's health</b>                                         |                     |                     |                                                                          |
| <b>Denominator – women assessed</b>                           | <b>3709</b>         | <b>3702</b>         |                                                                          |
| Pelvic pain <sup>a</sup>                                      | 211 / 3709 (5.7%)   | 176 / 3702 (4.8%)   | 1.20 (0.93 to 1.55)                                                      |
| Dysmenorrhoea <sup>a</sup>                                    | 208 / 3709 (5.6%)   | 171 / 3702 (4.6%)   | 1.22 (0.94 to 1.57)                                                      |
| Deep dyspareunia <sup>a</sup>                                 | 110 / 3709 (3.0%)   | 93 / 3702 (2.5%)    | 1.19 (0.83 to 1.69)                                                      |
| Urinary symptoms <sup>a,b</sup>                               | 35 / 3709 (1.0%)    | 27 / 3702 (1.0%)    | 1.30 (0.67 to 2.51)                                                      |
| Diagnostic laparoscopy/laparotomy <sup>c</sup>                | 1 / 3707 (0.03%)    | 1 / 3702 (0.03%)    | 1.01 (0.03 to 38.31)                                                     |
| Hysterectomy or tubal/ovarian surgery <sup>c</sup>            | 4 / 3709 (0.1%)     | 4 / 3702 (0.1%)     | 1.00 (0.16 to 6.15)                                                      |
| Bladder or bowel damage <sup>cd</sup>                         | 0 / 3709 (0.0%)     | 0 / 3702 (0.0%)     | -                                                                        |
| Bowel obstruction <sup>c</sup>                                | 1 / 3709 (0.03%)    | 1 / 3702 (0.03%)    | 1.00 (0.26 to 38.05)                                                     |
| <b>Reproductive status</b>                                    |                     |                     |                                                                          |
| <b>Denominator – women assessed</b>                           | <b>3709</b>         | <b>3702</b>         |                                                                          |
| Involuntary infertility                                       | 133 / 3709 (3.6%)   | 132 / 3702 (3.6%)   | 1.01 (0.74 to 1.37)                                                      |
| Use of fertility treatments                                   | 20 / 3709 (0.5%)    | 10 / 3701 (0.3%)    | 1.98 (0.73 to 5.38)                                                      |
| <b>Subsequent pregnancies</b>                                 |                     |                     |                                                                          |
| <b>Denominator – women assessed</b>                           | <b>3709</b>         | <b>3702</b>         |                                                                          |
| Any subsequent pregnancy                                      | 1889 / 3709 (51.0%) | 1904 / 3702 (51.4%) | 0.9 (0.93 to 1.05)                                                       |
| <b>Denominator – women with a subsequent pregnancy</b>        | <b>1889</b>         | <b>1904</b>         |                                                                          |
| Interpregnancy interval (months) <sup>f</sup>                 |                     |                     | HR                                                                       |
| Mean [sd]                                                     | 29.0 [11.6]         | 29.1 [11.7]         | 1.01 (0.93 to 1.10)                                                      |
| Median {IQR}                                                  | 27.9 {20.6 to 36.1} | 28.2 {20.5 to 36.5} |                                                                          |
| Miscarriage                                                   | 234 / 1873 (12.5%)  | 251 / 1889 (13.3%)  | 0.94 (0.76 to 1.17)                                                      |
| Ectopic pregnancy                                             | 6 / 1873 (0.3%)     | 4 / 1889 (0.2%)     | 1.51 (0.29 to 7.94)                                                      |
| <b>Denominator - women with a subsequent viable pregnancy</b> | <b>1889</b>         | <b>1904</b>         |                                                                          |
| Gestation at delivery (completed wks) <sup>g</sup>            |                     |                     | MD                                                                       |
| Mean [sd]                                                     | 38.2 [1.3]          | 38.1 [1.3]          | 0.04 (-0.07 to 0.16)                                                     |
| Median {IQR}                                                  | 38.6 {38.0 to 38.6} | 38.6 {38.0 to 38.6} |                                                                          |
| Bladder or bowel damage <sup>j</sup>                          | 1 / 1298 (0.08%)    | 0 / 1332 (0.00%)    | -                                                                        |
| <b>Denominator - women assessed</b>                           | <b>3709</b>         | <b>3702</b>         |                                                                          |
| Bladder or bowel damage <sup>j</sup>                          | 1 / 3709 (0.03%)    | 0 / 3702 (0.00%)    | -                                                                        |

<sup>a</sup> Following the CORONIS birth and before any subsequent pregnancy, any new onset or worsening.

<sup>b</sup> Urinary symptoms of poor stream and/or frequency which did not respond to antibiotics.

<sup>c</sup> Not related to pregnancy.

<sup>d</sup> In those women who have had surgery excluding diagnostic laparoscopy and diagnostic laparotomy.

<sup>e</sup> Following the CORONIS birth any new onset.

<sup>f</sup> From the CORONIS birth to the end of the subsequent pregnancy (regardless of loss or birth.)

<sup>g</sup> Of the first viable pregnancy (gestational age > 24 or >28 weeks depending on country specific definition.

<sup>h</sup> For the birth following the CORONIS birth.

<sup>i</sup> Includes: uterine rupture, uterine scar dehiscence, placenta praevia, morbidly adherent placenta, abruption, postpartum haemorrhage requiring transfusion, severe infection within 6 weeks, postpartum hysterectomy up to 6 weeks postpartum, manual removal of placenta.

<sup>j</sup> At the time of subsequent Caesarean section.

**Table S12 Closure of peritoneum**

| Outcome                                                       | Closure             | Non-Closure         | Adjusted risk ratio or hazards ratio (HR) (99% CI) |
|---------------------------------------------------------------|---------------------|---------------------|----------------------------------------------------|
| <b>Women's health and mortality</b>                           |                     |                     |                                                    |
| <b>Denominator – women assessed</b>                           | <b>4036</b>         | <b>4087</b>         |                                                    |
| Dysmenorrhoea <sup>a</sup>                                    | 255 / 4306 (6.3%)   | 235 / 4087 (5.7%)   | 1.10 (0.88 to 1.38)                                |
| Urinary symptoms <sup>a,b</sup>                               | 39 / 4036 (1.0%)    | 51 / 4087 (1.2%)    | 0.77 (0.45 to 1.33)                                |
| Abdominal hernias <sup>c</sup>                                | 39 / 4036 (1.0%)    | 43 / 4087 (1.0%)    | 0.92 (0.52 to 1.62)                                |
| <b>Denominator – women eligible to be assessed</b>            | <b>4783</b>         | <b>4816</b>         |                                                    |
| Woman's death                                                 | 24 / 4773 (0.5%)    | 25 / 4805 (0.5%)    | 0.96 (0.50 to 2.00)                                |
| <b>Reproductive status</b>                                    |                     |                     |                                                    |
| <b>Denominator - Women with no subsequent pregnancy</b>       | <b>2350</b>         | <b>2382</b>         |                                                    |
| Voluntary infertility                                         | 2238 / 2350 (95.2%) | 2262 / 2382 (95.0%) | 1.00 (0.99 to 1.02)                                |
| <b>Denominator – women assessed</b>                           | <b>4036</b>         | <b>4087</b>         |                                                    |
| Voluntary infertility                                         | 2238 / 4036 (55.5%) | 2622 / 4087 (64.2%) | 1.00 (0.95 to 1.05)                                |
| <b>Subsequent pregnancies</b>                                 |                     |                     |                                                    |
| <b>Denominator – women assessed</b>                           | <b>4036</b>         | <b>4087</b>         |                                                    |
| Any subsequent pregnancy                                      | 1686 / 4036 (42.0%) | 1705 / 4087 (42.0%) | 1.00 (0.94 to 1.07)                                |
| <b>Denominator – women with a subsequent pregnancy</b>        | <b>1686</b>         | <b>1705</b>         |                                                    |
| Interpregnancy interval (months) <sup>f</sup>                 |                     |                     | HR                                                 |
| Mean [sd]                                                     | 28.7 [11.6]         | 28.3 [12.1]         |                                                    |
| Median {IQR}                                                  | 27.8 {19.9 to 35.9} | 27.0 {18.9 to 36.3} | 1.00 (0.91 to 1.09)                                |
| <b>Denominator - women with a subsequent viable pregnancy</b> | <b>1411</b>         | <b>1438</b>         |                                                    |
| Bladder or bowel damage <sup>g</sup>                          | 1 / 1208 (0.08%)    | 1 / 1209 (0.08%)    | 1.00 (0.02 to 38.17)                               |
| <b>Denominator - women assessed</b>                           | <b>4036</b>         | <b>4087</b>         |                                                    |
| Bladder or bowel damage <sup>g</sup>                          | 1 / 3816 (0.03%)    | 1 / 3828 (0.03%)    | 1.00 (0.03 to 38.30)                               |

<sup>a</sup> Following the CORONIS birth and before any subsequent pregnancy, any new onset or worsening.

<sup>b</sup> Urinary symptoms of poor stream and/or frequency which did not respond to antibiotics.

<sup>c</sup> Not related to pregnancy.

<sup>d</sup> In those women who have had surgery excluding diagnostic laparoscopy and diagnostic laparotomy.

<sup>e</sup> Following the CORONIS birth any new onset.

<sup>f</sup> From the CORONIS birth to the end of the subsequent pregnancy (regardless of loss or birth.)

<sup>g</sup> Of the first viable pregnancy (gestational age > 24 or >28 weeks depending on country specific definition.

<sup>h</sup> For the birth following the CORONIS birth.

<sup>i</sup> Includes: uterine rupture, uterine scar dehiscence, placenta praevia, morbidly adherent placenta, abruption, postpartum haemorrhage requiring transfusion, severe infection within 6 weeks, postpartum hysterectomy up to 6 weeks postpartum, manual removal of placenta.

<sup>j</sup> At the time of subsequent Caesarean section.

Table S13

## Uterine repair suture

| Outcome                                                       | Catgut              | PG-910              | Adjusted risk ratio, mean difference (MD) or hazards ratio (HR) (99% CI) |
|---------------------------------------------------------------|---------------------|---------------------|--------------------------------------------------------------------------|
| <b>Women's health and mortality</b>                           |                     |                     |                                                                          |
| <b>Denominator – women assessed</b>                           | <b>3974</b>         | <b>3972</b>         |                                                                          |
| Pelvic pain <sup>a</sup>                                      | 202 / 3974 (5.1%)   | 218 / 3972 (5.5%)   | 0.93 (0.73 to 1.18)                                                      |
| Dysmenorrhoea <sup>a</sup>                                    | 191 / 3974 (4.8%)   | 207 / 3972 (5.2%)   | 0.92 (0.72 to 1.19)                                                      |
| Deep dyspareunia <sup>a</sup>                                 | 116 / 3974 (2.9%)   | 133 / 3972 (3.4%)   | 0.87 (0.63 to 1.20)                                                      |
| Urinary symptoms <sup>a,b</sup>                               | 43 / 3974 (1.1%)    | 45 / 3972 (1.1%)    | 0.95 (0.55 to 1.65)                                                      |
| Diagnostic laparoscopy/laparotomy <sup>c</sup>                | 2 / 3974 (0.05%)    | 2 / 3972 (0.05%)    | 1.00 (0.76 to 13.15)                                                     |
| Hysterectomy or tubal/ovarian surgery <sup>c</sup>            | 11 / 3974 (0.3%)    | 10 / 3972 (0.3%)    | 1.09 (0.37 to 3.37)                                                      |
| Bladder or bowel damage <sup>cd</sup>                         | 1 / 72 (1.4%)       | 0 / 74 (0.0%)       | -                                                                        |
| Bowel obstruction <sup>c</sup>                                | 2 / 3974 (0.05%)    | 0 / 3972 (0.00%)    | -                                                                        |
| <b>Reproductive status</b>                                    |                     |                     |                                                                          |
| <b>Denominator – women assessed</b>                           | <b>3974</b>         | <b>3972</b>         |                                                                          |
| Involuntary infertility                                       | 162 / 3974 (4.1%)   | 182 / 3972 (4.6%)   | 0.88 (0.68 to 1.16)                                                      |
| Use of fertility treatments                                   | 20 / 3972 (0.5%)    | 16 / 3971 (0.4%)    | 1.24 (0.53 to 2.94)                                                      |
| <b>Subsequent pregnancies</b>                                 |                     |                     |                                                                          |
| <b>Denominator – women assessed</b>                           | <b>3974</b>         | <b>3972</b>         |                                                                          |
| Any subsequent pregnancy                                      | 1861 / 3974 (46.8%) | 1842 / 3972 (46.4%) | 1.00 (0.95 to 1.07)                                                      |
| <b>Denominator – women with a subsequent pregnancy</b>        | <b>1861</b>         | <b>1842</b>         |                                                                          |
| Interpregnancy interval (months) <sup>f</sup>                 |                     |                     | HR                                                                       |
| Mean [sd]                                                     | 28.9 [11.8]         | 29.6 [11.5]         |                                                                          |
| Median {IQR}                                                  | 27.5 {20.2 to 36.4} | 28.7 {20.7 to 36.9} | 1.04 (0.95 to 1.13)                                                      |
| Miscarriage                                                   | 236 / 1844 (13.0%)  | 210 / 1833 (11.5%)  | 1.11 (0.89 to 1.40)                                                      |
| Ectopic pregnancy                                             | 4 / 1844 (0.2%)     | 4 / 1833 (0.2%)     | 1.00 (0.16 to 6.15)                                                      |
| <b>Denominator - women with a subsequent viable pregnancy</b> | <b>1661</b>         | <b>1648</b>         |                                                                          |
| Gestation at delivery (completed wks) <sup>g</sup>            |                     |                     | MD                                                                       |
| Mean [sd]                                                     | 38.1 [1.4]          | 38.2 [1.3]          |                                                                          |
| Median {IQR}                                                  | 38.6 {38.0 to 38.6} | 38.6 {38.0 to 38.6} | -0.07 (-0.19 to 0.06)                                                    |
| Bladder or bowel damage <sup>j</sup>                          | 1 / 1449 (0.07%)    | 2 / 1429 (0.14%)    | 0.49 (0.02 to 11.54)                                                     |
| <b>Denominator - women assessed</b>                           | <b>3974</b>         | <b>3972</b>         |                                                                          |
| Bladder or bowel damage <sup>j</sup>                          | 1 / 3745 (0.03%)    | 2 / 3744 (0.05%)    | 0.50 (0.02 to 11.71)                                                     |

- <sup>a</sup> Following the CORONIS birth and before any subsequent pregnancy, any new onset or worsening.
- <sup>b</sup> Urinary symptoms of poor stream and/or frequency which did not respond to antibiotics.
- <sup>c</sup> Not related to pregnancy.
- <sup>d</sup> In those women who have had surgery excluding diagnostic laparoscopy and diagnostic laparotomy.
- <sup>e</sup> Following the CORONIS birth any new onset.
- <sup>f</sup> From the CORONIS birth to the end of the subsequent pregnancy (regardless of loss or birth.)
- <sup>g</sup> Of the first viable pregnancy (gestational age > 24 or >28 weeks depending on country specific definition).
- <sup>h</sup> For the birth following the CORONIS birth.
- <sup>i</sup> Includes: uterine rupture, uterine scar dehiscence, placenta praevia, morbidly adherent placenta, abruption, postpartum haemorrhage requiring transfusion, severe infection within 6 weeks, postpartum hysterectomy up to 6 weeks postpartum, manual removal of placenta.
- <sup>j</sup> At the time of subsequent Caesarean section.

**Table S14 All outcomes by sub-continent and overall**

|                                                                       | South America       | East and West Africa | South Asia          | Totals               |
|-----------------------------------------------------------------------|---------------------|----------------------|---------------------|----------------------|
| <b>Women's health and mortality</b>                                   |                     |                      |                     |                      |
| <b>Denominator – women assessed</b>                                   | <b>2405</b>         | <b>3785</b>          | <b>6963</b>         | <b>13153</b>         |
| Pelvic pain <sup>a</sup>                                              | 138 / 2405 (5.7%)   | 180 / 3785 (4.8%)    | 346 / 6963 (5.0%)   | 664 / 13153 (5.0%)   |
| Dysmenorrhoea <sup>a</sup>                                            | 252 / 2405 (10.5%)  | 191 / 3785 (5.0%)    | 271 / 6963 (3.9%)   | 714 / 13153 (5.4%)   |
| Deep dyspareunia <sup>a</sup>                                         | 150 / 2405 (6.2%)   | 128 / 3785 (3.4%)    | 152 / 6963 (2.2%)   | 430 / 13153 (3.3%)   |
| Urinary symptoms <sup>ab</sup>                                        | 43 / 2405 (1.8%)    | 40 / 3785 (1.1%)     | 54 / 6963 (0.8%)    | 137 / 13153 (1.0%)   |
| Diagnostic laparoscopy/laparotomy <sup>b</sup>                        | 5 / 2405 (0.2%)     | 2 / 3783 (0.1%)      | 0 / 6963 (0.0%)     | 7 / 13151 (0.1%)     |
| Hysterectomy or tubal/ovarian surgery <sup>b</sup>                    | 11 / 2405 (0.5%)    | 8 / 3785 (0.2%)      | 11 / 6963 (0.2%)    | 30 / 13153 (0.2%)    |
| Bladder or bowel damage <sup>bc</sup>                                 | 0 / 115 (0.0%)      | 1 / 36 (2.8%)        | 0 / 113 (0.0%)      | 1 / 264 (0.4%)       |
| Abdominal hernias <sup>d</sup>                                        | 37 / 2405 (1.5%)    | 18 / 3785 (0.5%)     | 47 / 6963 (0.7%)    | 102 / 13153 (0.8%)   |
| Bowel obstruction <sup>d</sup>                                        | 1 / 2405 (0.04%)    | 2 / 3785 (0.05%)     | 2 / 6963 (0.03%)    | 5 / 13153 (0.04%)    |
| <b>Denominator – women eligible to be assessed</b>                    | <b>2782</b>         | <b>4504</b>          | <b>8347</b>         | <b>15633</b>         |
| Woman's death                                                         | 9 / 2782 (0.3%)     | 32 / 4504 (0.7%)     | 48 / 8347 (0.6%)    | 89 / 15633 (0.6%)    |
| <b>Reproductive status</b>                                            |                     |                      |                     |                      |
| <b>Denominator - women with no subsequent pregnancy</b>               | <b>1800</b>         | <b>2028</b>          | <b>3510</b>         | <b>7338</b>          |
| Voluntary infertility                                                 | 1773 / 1800 (98.5%) | 1773 / 2028 (87.4%)  | 3276 / 3510 (93.3%) | 6822 / 7338 (93.0%)  |
| <b>Denominator – women assessed</b>                                   | <b>2405</b>         | <b>3785</b>          | <b>6963</b>         | <b>13153</b>         |
| Involuntary infertility                                               | 23 / 2405 (1.0%)    | 201 / 3785 (5.3%)    | 191 / 6963 (2.7%)   | 415 / 13153 (3.2%)   |
| Use of fertility treatments                                           | 0 / 2403 (0.0%)     | 19 / 3784 (0.5%)     | 27 / 6963 (0.4%)    | 46 / 13150 (0.3%)    |
| <b>Subsequent pregnancies</b>                                         |                     |                      |                     |                      |
| <b>Denominator – women assessed</b>                                   | <b>2405</b>         | <b>3785</b>          | <b>6963</b>         | <b>13153</b>         |
| Any subsequent pregnancy                                              | 605 / 2405 (25.2%)  | 1757 / 3785 (46.4%)  | 3453 / 6963 (49.6%) | 5815 / 13153 (44.2%) |
| <b>Denominator – women with a subsequent pregnancy</b>                | <b>605</b>          | <b>1757</b>          | <b>3453</b>         | <b>5815</b>          |
| Interpregnancy interval (months) <sup>e</sup>                         |                     |                      |                     |                      |
| Mean [sd]                                                             | 31.9 [12.9]         | 31.6 [11.9]          | 27.7 [11.5]         | 29.3 [11.9]          |
| Median {IQR}                                                          | 31.5 {21.6 to 39.1} | 30.4 {22.6 to 39.3}  | 26.7 {19.0 to 35.0} | 28.3 {20.3 to 36.8}  |
| Miscarriage (excludes women pregnant at the time of assessment)       | 52 / 584 (8.9%)     | 201 / 1752 (11.5%)   | 453 / 3415 (13.3%)  | 706 / 5751 (12.3%)   |
| Ectopic pregnancy (excludes women pregnant at the time of assessment) | 4 / 584 (0.7%)      | 4 / 1752 (0.2%)      | 8 / 3415 (0.2%)     | 16 / 5751 (0.3%)     |



| <b>Table S14 continued</b><br><b>Denominator - women with a subsequent viable pregnancy<sup>f</sup></b> | <b>South America</b> | <b>East and West Africa</b> | <b>South Asia</b>   | <b>Totals</b>       |
|---------------------------------------------------------------------------------------------------------|----------------------|-----------------------------|---------------------|---------------------|
| Gestation at delivery (completed wks)                                                                   |                      |                             |                     |                     |
| Mean [sd]                                                                                               | 38.4 [1.9]           | 38.4 [1.3]                  | 38.0 [1.4]          | 38.2 [1.5]          |
| Median {IQR}                                                                                            | 38.6 {38.0 to 39.0}  | 38.6 {38.0 to 38.6}         | 38.0 {38.0 to 38.6} | 38.6 {38.0 to 38.6} |
| Stillbirth <sup>e</sup>                                                                                 | 3 / 541 (0.6%)       | 45 / 1630 (2.8%)            | 44 / 2879 (1.5%)    | 92 / 5050 (1.8%)    |
| Neonatal death <sup>e</sup>                                                                             | 6 / 538 (1.1%)       | 27 / 1582 (1.7%)            | 54 / 2835 (1.9%)    | 87 / 4955 (1.8%)    |
| Mode of delivery <sup>e</sup>                                                                           |                      |                             |                     |                     |
| Non-instrumental vaginal                                                                                | 65 / 541 (12.0%)     | 265 / 1629 (16.3%)          | 428 / 2879 (14.9%)  | 758 / 5049 (15.0%)  |
| Instrumental vaginal                                                                                    | 1 / 541 (0.2%)       | 3 / 1629 (0.2%)             | 53 / 2879 (1.8%)    | 57 / 5049 (1.1%)    |
| Pre-labour caesarean section                                                                            | 424 / 541 (78.4%)    | 1089 / 1629 (66.9%)         | 1815 / 2879 (63.0%) | 3328 / 5049 (65.9%) |
| In labour caesarean section                                                                             | 51 / 541 (9.4%)      | 272 / 1629 (16.7%)          | 583 / 2879 (20.3%)  | 906 / 5049 (17.9%)  |
| All caesarean sections <sup>e</sup>                                                                     | 475 / 541 (87.8%)    | 1361 / 1629 (83.5%)         | 2398 / 2879 (83.3%) | 4234 / 5049 (83.9%) |
| <b>Denominator - women with a subsequent viable pregnancy<sup>f</sup></b>                               | <b>536</b>           | <b>1604</b>                 | <b>2852</b>         | <b>4992</b>         |
| Other pregnancy complications – composite <sup>eg</sup>                                                 | 29 / 535 (5.4%)      | 44 / 1601 (2.7%)            | 56 / 2851 (2.0%)    | 129 / 4987 (2.6%)   |
| Uterine rupture <sup>e</sup>                                                                            | 0 / 536 (0.00%)      | 1 / 1602 (0.06%)            | 4 / 2852 (0.14%)    | 5 / 4990 (0.10%)    |
| Uterine scar dehiscence <sup>e</sup>                                                                    | 2 / 536 (0.4%)       | 3 / 1601 (0.2%)             | 5 / 2852 (0.2%)     | 10 / 4989 (0.2%)    |
| Placenta praevia <sup>e</sup>                                                                           | 3 / 536 (0.6%)       | 9 / 1601 (0.6%)             | 9 / 2852 (0.3%)     | 21 / 4989 (0.4%)    |
| Morbidly adherent placenta <sup>e</sup>                                                                 | 1 / 536 (0.19%)      | 1 / 1601 (0.06%)            | 5 / 2852 (0.18%)    | 7 / 4989 (0.14%)    |
| Abruptio <sup>e</sup>                                                                                   | 1 / 536 (0.2%)       | 5 / 1602 (0.3%)             | 8 / 2852 (0.3%)     | 14 / 4990 (0.3%)    |
| Postpartum haemorrhage requiring transfusion of >1 unit of whole blood or packed cells <sup>e</sup>     | 3 / 536 (0.6%)       | 9 / 1602 (0.6%)             | 10 / 2852 (0.4%)    | 22 / 4990 (0.4%)    |
| Severe infection within 6 weeks postpartum <sup>e</sup>                                                 | 14 / 535 (2.6%)      | 10 / 1602 (0.6%)            | 25 / 2851 (0.9%)    | 49 / 4988 (1.0%)    |
| Hysterectomy up to 6 weeks postpartum <sup>e</sup>                                                      | 1 / 536 (0.19%)      | 2 / 1603 (0.12%)            | 2 / 2852 (0.07%)    | 5 / 4991 (0.10%)    |
| Manual removal of placenta <sup>e</sup>                                                                 | 6 / 536 (1.1%)       | 9 / 1603 (0.6%)             | 3 / 2852 (0.1%)     | 18 / 4991 (0.4%)    |
| Bladder or bowel damage <sup>h</sup>                                                                    | 0 / 471 (0.0%)       | 1 / 1339 (0.07%)            | 2 / 2375 (0.08%)    | 3 / 4185 (0.07%)    |
| <b>CORONIS child(ren)</b>                                                                               |                      |                             |                     |                     |
| <b>Denominator – live born children of women eligible to be assessed</b>                                | <b>2866</b>          | <b>4658</b>                 | <b>8574</b>         | <b>16098</b>        |
| Known deaths or serious morbidity of CORONIS child(ren)                                                 | 113 / 2866 (3.9%)    | 288 / 4658 (6.2%)           | 351 / 8574 (4.1%)   | 752 / 16098 (4.7%)  |

<sup>a</sup> Following the CORONIS birth and before any subsequent pregnancy, any new onset or worsening.

<sup>b</sup> Not related to pregnancy.

<sup>c</sup> Excluding diagnostic laparoscopy and diagnostic laparotomy.

<sup>d</sup> Following the CORONIS birth, any new onset.

<sup>e</sup> For the birth following the CORONIS birth

<sup>f</sup> Viability could not be assessed if gestational age was not recorded

<sup>g</sup> Includes: uterine rupture, uterine scar dehiscence, placenta praevia, morbidly adherent placenta, abruptio, postpartum haemorrhage requiring transfusion,

severe infection within 6 weeks postpartum, hysterectomy up to 6 weeks postpartum, manual removal of placenta.

<sup>h</sup> at the time of subsequent Caesarean section.

Missing data are <1% unless otherwise stated.

Table S15

## All outcomes by region and overall

|                                                         | Argentina             | Chile                | Ghana                | India – Delhi          | India – Vellore        | Kenya                | Pakistan              | Sudan                | Totals                 |
|---------------------------------------------------------|-----------------------|----------------------|----------------------|------------------------|------------------------|----------------------|-----------------------|----------------------|------------------------|
| <i>Women's health and mortality</i>                     |                       |                      |                      |                        |                        |                      |                       |                      |                        |
| <b>Denominator – women assessed</b>                     | <b>1271</b>           | <b>1134</b>          | <b>1041</b>          | <b>2862</b>            | <b>2063</b>            | <b>1446</b>          | <b>2038</b>           | <b>1298</b>          | <b>13153</b>           |
| Pelvic pain <sup>a</sup>                                | 84 / 1271<br>(6.6%)   | 54 / 1134<br>(4.8%)  | 41 / 1041<br>(3.9%)  | 84 / 2862<br>(2.9%)    | 35 / 2063<br>(1.7%)    | 54 / 1446<br>(3.7%)  | 227 / 2038<br>(11.1%) | 85 / 1298<br>(6.5%)  | 664 / 13153<br>(5.0%)  |
| Dysmenorrhoea <sup>a</sup>                              | 159 / 1271<br>(12.5%) | 93 / 1134<br>(8.2%)  | 43 / 1041<br>(4.1%)  | 71 / 2862<br>(2.5%)    | 42 / 2063<br>(2.0%)    | 52 / 1446<br>(3.6%)  | 158 / 2038<br>(7.8%)  | 96 / 1298<br>(7.4%)  | 714 / 13153<br>(5.4%)  |
| Deep dyspareunia <sup>a</sup>                           | 106 / 1271<br>(8.3%)  | 44 / 1134<br>(3.9%)  | 37 / 1041<br>(3.6%)  | 29 / 2862<br>(1.0%)    | 20 / 2063<br>(1.0%)    | 40 / 1446<br>(2.8%)  | 103 / 2038<br>(5.1%)  | 51 / 1298<br>(3.9%)  | 430 / 13153<br>(3.3%)  |
| Urinary symptoms <sup>a,b</sup>                         | 25 / 1271<br>(2.0%)   | 18 / 1134<br>(1.6%)  | 18 / 1041<br>(1.7%)  | 7 / 2862<br>(0.2%)     | 9 / 2063<br>(0.4%)     | 13 / 1446<br>(0.9%)  | 38 / 2038<br>(1.9%)   | 9 / 1298<br>(0.7%)   | 137 / 13153<br>(1.0%)  |
| Diagnostic laparoscopy/laparotomy <sup>b</sup>          | 2 / 1271<br>(0.2%)    | 3 / 1134<br>(0.3%)   | 0 / 1039<br>(0.0%)   | 0 / 2862<br>(0.0%)     | 0 / 2063<br>(0.0%)     | 1 / 1446<br>(0.1%)   | 0 / 2038<br>(0.0%)    | 1 / 1298<br>(0.1%)   | 7 / 13151<br>(0.1%)    |
| Hysterectomy or tubal/ovarian surgery <sup>b</sup>      | 5 / 1271<br>(0.4%)    | 6 / 1134<br>(0.5%)   | 2 / 1041<br>(0.2%)   | 2 / 2862<br>(0.1%)     | 6 / 2063<br>(0.3%)     | 6 / 1446<br>(0.4%)   | 3 / 2038<br>(0.1%)    | 0 / 1298<br>(0.0%)   | 30 / 13153<br>(0.2%)   |
| Bladder or bowel damage <sup>b,c</sup>                  | 0 / 52<br>(0.0%)      | 0 / 63<br>(0.0%)     | 0 / 5<br>(0.0%)      | 0 / 35<br>(0.0%)       | 0 / 48<br>(0.0%)       | 1 / 15<br>(6.7%)     | 0 / 30<br>(0.0%)      | 0 / 16<br>(0.0%)     | 1 / 264<br>(0.4%)      |
| Abdominal hernias <sup>d</sup>                          | 21 / 1271<br>(1.7%)   | 16 / 1134<br>(1.4%)  | 2 / 1041<br>(0.2%)   | 8 / 2862<br>(0.3%)     | 33 / 2063<br>(1.6%)    | 2 / 1446<br>(0.1%)   | 6 / 2038<br>(0.3%)    | 14 / 1298<br>(1.1%)  | 102 / 13153<br>(0.8%)  |
| Bowel obstruction <sup>d</sup>                          | 1 / 1271<br>(0.08%)   | 0 / 1134<br>(0.0%)   | 0 / 1041<br>(0.0%)   | 2 / 2862<br>(0.07%)    | 0 / 2063<br>(0.0%)     | 2 / 1446<br>(0.14%)  | 0 / 2038<br>(0.0%)    | 0 / 1298<br>(0.0%)   | 5 / 13153<br>(0.04%)   |
| <b>Denominator – women eligible to be assessed</b>      | <b>1611</b>           | <b>1171</b>          | <b>1267</b>          | <b>3753</b>            | <b>2086</b>            | <b>1644</b>          | <b>2508</b>           | <b>1593</b>          | <b>15633</b>           |
| Woman's death                                           | 6 / 1611<br>(0.4%)    | 3 / 1171<br>(0.3%)   | 10 / 1267<br>(0.8%)  | 27 / 3753<br>(0.7%)    | 9 / 2086<br>(0.4%)     | 16 / 1644<br>(1.0%)  | 12 / 2508<br>(0.5%)   | 6 / 1593<br>(0.4%)   | 89 / 15633<br>(0.6%)   |
| <i>Reproductive status</i>                              |                       |                      |                      |                        |                        |                      |                       |                      |                        |
| <b>Denominator - Women with no subsequent pregnancy</b> | <b>873</b>            | <b>927</b>           | <b>498</b>           | <b>1535</b>            | <b>1277</b>            | <b>965</b>           | <b>698</b>            | <b>565</b>           | <b>7338</b>            |
| Voluntary infertility                                   | 857 / 873<br>(98.2%)  | 916 / 927<br>(98.8%) | 422 / 498<br>(84.7%) | 1483 / 1535<br>(96.6%) | 1180 / 1277<br>(92.4%) | 933 / 965<br>(96.7%) | 613 / 698<br>(87.8%)  | 418 / 565<br>(74.0%) | 6822 / 7338<br>(93.0%) |

| <b>Table S15 continued</b>                                                          |                       |                       |                       |                        |                       |                       |                        |                       |                         |
|-------------------------------------------------------------------------------------|-----------------------|-----------------------|-----------------------|------------------------|-----------------------|-----------------------|------------------------|-----------------------|-------------------------|
| <b>Denominator – women assessed</b>                                                 | <b>1271</b>           | <b>1134</b>           | <b>1041</b>           | <b>2862</b>            | <b>2063</b>           | <b>1446</b>           | <b>2038</b>            | <b>1298</b>           | <b>13153</b>            |
| Involuntary infertility                                                             | 13 / 1271<br>(1.0%)   | 10 / 1134<br>(0.9%)   | 63 / 1041<br>(6.1%)   | 39 / 2862<br>(1.4%)    | 86 / 2063<br>(4.2%)   | 27 / 1446<br>(1.9%)   | 66 / 2038<br>(3.2%)    | 111 / 1298<br>(8.6%)  | 415 / 13153<br>(3.2%)   |
| Use of fertility treatments                                                         | 0 / 1271<br>(0.0%)    | 0 / 1132<br>(0.0%)    | 5 / 1040<br>(0.5%)    | 7 / 2862<br>(0.2%)     | 9 / 2063<br>(0.4%)    | 3 / 1446<br>(0.2%)    | 11 / 2038<br>(0.5%)    | 11 / 1298<br>(0.9%)   | 46 / 13150<br>(0.3%)    |
| <b>Subsequent pregnancies</b>                                                       |                       |                       |                       |                        |                       |                       |                        |                       |                         |
| <b>Denominator – women assessed</b>                                                 | <b>1271</b>           | <b>1134</b>           | <b>1041</b>           | <b>2862</b>            | <b>2063</b>           | <b>1446</b>           | <b>2038</b>            | <b>1298</b>           | <b>13153</b>            |
| Any subsequent pregnancy                                                            | 398 / 1271<br>(31.3%) | 207 / 1134<br>(18.3%) | 543 / 1041<br>(52.2%) | 1327 / 2862<br>(46.4%) | 786 / 2063<br>(38.1%) | 481 / 1446<br>(33.3%) | 1340 / 2038<br>(65.8%) | 733 / 1298<br>(56.5%) | 5815 / 13153<br>(44.2%) |
| <b>Denominator – women with a subsequent pregnancy</b>                              | <b>398</b>            | <b>207</b>            | <b>543</b>            | <b>1327</b>            | <b>786</b>            | <b>481</b>            | <b>1340</b>            | <b>733</b>            | <b>5815</b>             |
| Interpregnancy interval (months) <sup>e</sup>                                       |                       |                       |                       |                        |                       |                       |                        |                       |                         |
| Mean [sd]                                                                           | 33.8 [14.1]           | 28.2 [9.1]            | 32.9 [12.9]           | 29.3 [12.4]            | 27.8 [11.6]           | 32.1 [12.2]           | 26.1 [10.3]            | 30.3 [10.8]           | 29.3 [11.9]             |
| Median {IQR}                                                                        | 33.1 {22.1 to 42.8}   | 28.8 {21.0 to 35.5}   | 31.3 {22.7 to 41.5}   | 28.7 {20.1 to 37.0}    | 26.4 {19.1 to 35.7}   | 31.1 {22.9 to 39.5}   | 24.9 {18.3 to 32.8}    | 29.4 {22.2 to 37.0}   | 28.3 {20.3 to 36.8}     |
| Miscarriage <sup>f</sup>                                                            | 28 / 381<br>(7.3%)    | 24 / 203<br>(11.8%)   | 66 / 541<br>(12.2%)   | 175 / 1312<br>(13.3%)  | 73 / 782<br>(9.3%)    | 50 / 480<br>(10.4%)   | 205 / 1321<br>(15.5%)  | 85 / 731<br>(11.6%)   | 706 / 5751<br>(12.3%)   |
| Ectopic pregnancy <sup>f</sup>                                                      | 1 / 381<br>(0.3%)     | 3 / 203<br>(1.5%)     | 1 / 541<br>(0.2%)     | 3 / 1312<br>(0.2%)     | 2 / 782<br>(0.3%)     | 1 / 480<br>(0.2%)     | 3 / 1321<br>(0.2%)     | 2 / 731<br>(0.3%)     | 16 / 5751<br>(0.3%)     |
| <b>Denominator - women with a subsequent viable pregnancy<sup>g</sup></b>           | <b>359</b>            | <b>177</b>            | <b>492</b>            | <b>986</b>             | <b>662</b>            | <b>438</b>            | <b>1204</b>            | <b>674</b>            | <b>4992</b>             |
| Gestation at delivery (completed wks)                                               |                       |                       |                       |                        |                       |                       |                        |                       |                         |
| Mean [sd]                                                                           | 38.5 [2.0]            | 38.2 [1.7]            | 38.3 [1.2]            | 38.3 [1.6]             | 38.2 [1.6]            | 38.6 [1.9]            | 37.8 [1.2]             | 38.3 [0.9]            | 38.2 [1.5]              |
| Median {IQR}                                                                        | 38.6 {38.0 to 39.0}   | 38.0 {38.0 to 39.0}   | 38.6 {38.6 to 38.6}   | 38.6 {38.0 to 38.6}    | 38.0 {38.0 to 39.0}   | 38.6 {38.0 to 40.0}   | 38.0 {38.0 to 38.0}    | 38.6 {38.0 to 38.6}   | 38.6 {38.0 to 38.6}     |
| <b>Denominator – babies of women with a subsequent viable pregnancy<sup>g</sup></b> | <b>361</b>            | <b>180</b>            | <b>504</b>            | <b>992</b>             | <b>668</b>            | <b>443</b>            | <b>1219</b>            | <b>683</b>            | <b>5050</b>             |
| Stillbirth <sup>c</sup>                                                             | 2 / 361<br>(0.6%)     | 1 / 180<br>(0.6%)     | 20 / 504<br>(4.0%)    | 12 / 992<br>(1.2%)     | 9 / 668<br>(1.4%)     | 12 / 443<br>(2.7%)    | 23 / 1219<br>(1.9%)    | 13 / 683<br>(1.9%)    | 92 / 5050<br>(1.8%)     |
| Neonatal death <sup>e,h</sup>                                                       | 6 / 359<br>(1.7%)     | 0 / 179<br>(0.0%)     | 8 / 481<br>(1.7%)     | 17 / 980<br>(1.7%)     | 5 / 659<br>(0.8%)     | 8 / 431<br>(1.9%)     | 32 / 1196<br>(2.7%)    | 11 / 670<br>(1.6%)    | 87 / 4955<br>(1.8%)     |

| <b>Table S15 continued</b>                                                                          |                      |                      |                      |                      |                      |                      |                        |                      |                        |
|-----------------------------------------------------------------------------------------------------|----------------------|----------------------|----------------------|----------------------|----------------------|----------------------|------------------------|----------------------|------------------------|
| Mode of delivery <sup>c</sup>                                                                       |                      |                      |                      |                      |                      |                      |                        |                      |                        |
| Non-instrumental vaginal                                                                            | 50 / 361<br>(13.9%)  | 15 / 180<br>(8.3%)   | 146 / 504<br>(29.0%) | 292 / 992<br>(29.4%) | 28 / 668<br>(4.2%)   | 56 / 442<br>(12.7%)  | 108 / 1219<br>(8.9%)   | 63 / 683<br>(9.2%)   | 758 / 5049<br>(15.0%)  |
| Instrumental vaginal                                                                                | 0 / 361<br>(0.0%)    | 1 / 180<br>(0.6%)    | 3 / 504<br>(0.6%)    | 10 / 992<br>(1.0%)   | 43 / 668<br>(6.4%)   | 0 / 442<br>(0.0%)    | 0 / 1219<br>(0.0%)     | 0 / 683<br>(0.0%)    | 57 / 5049<br>(1.1%)    |
| Pre-labour caesarean section                                                                        | 276 / 361<br>(76.5%) | 148 / 180<br>(82.2%) | 270 / 504<br>(53.6%) | 287 / 992<br>(28.9%) | 433 / 668<br>(64.8%) | 262 / 442<br>(59.3%) | 1095 / 1219<br>(89.8%) | 557 / 683<br>(81.6%) | 3328 / 5049<br>(65.9%) |
| In labour caesarean section                                                                         | 35 / 361<br>(9.7%)   | 16 / 180<br>(8.9%)   | 85 / 504<br>(16.9%)  | 403 / 992<br>(40.6%) | 164 / 668<br>(24.6%) | 124 / 442<br>(28.1%) | 16 / 1219<br>(1.3%)    | 63 / 683<br>(9.2%)   | 906 / 5049<br>(17.9%)  |
| All caesarean sections <sup>c</sup>                                                                 | 311 / 361<br>(86.1%) | 164 / 180<br>(91.1%) | 355 / 504<br>(70.4%) | 690 / 992<br>(69.6%) | 597 / 668<br>(89.4%) | 386 / 442<br>(87.3%) | 1111 / 1219<br>(91.1%) | 620 / 683<br>(90.8%) | 4234 / 5049<br>(83.9%) |
| <b>Denominator - women with a subsequent viable pregnancy<sup>e</sup></b>                           | <b>359</b>           | <b>177</b>           | <b>492</b>           | <b>986</b>           | <b>662</b>           | <b>438</b>           | <b>1204</b>            | <b>674</b>           | <b>4992</b>            |
| Other pregnancy complications – composite <sup>e,i</sup>                                            | 23 / 358<br>(6.4%)   | 6 / 177<br>(3.4%)    | 10 / 490<br>(2.0%)   | 22 / 985<br>(2.2%)   | 16 / 662<br>(2.4%)   | 13 / 437<br>(3.0%)   | 18 / 1204<br>(1.5%)    | 21 / 674<br>(3.1%)   | 129 / 4987<br>(2.6%)   |
| Uterine rupture <sup>c</sup>                                                                        | 0 / 359<br>(0.0%)    | 0 / 177<br>(0.0%)    | 1 / 491<br>(0.2%)    | 1 / 986<br>(0.1%)    | 1 / 662<br>(0.2%)    | 0 / 437<br>(0.0%)    | 2 / 1204<br>(0.2%)     | 0 / 674<br>(0.0%)    | 5 / 4990<br>(0.1%)     |
| Uterine scar dehiscence <sup>c</sup>                                                                | 2 / 359<br>(0.6%)    | 0 / 177<br>(0.0%)    | 0 / 490<br>(0.0%)    | 3 / 986<br>(0.3%)    | 2 / 662<br>(0.3%)    | 0 / 437<br>(0.0%)    | 0 / 1204<br>(0.0%)     | 3 / 674<br>(0.4%)    | 10 / 4989<br>(0.2%)    |
| Placenta praevia <sup>c</sup>                                                                       | 3 / 359<br>(0.8%)    | 0 / 177<br>(0.0%)    | 3 / 490<br>(0.6%)    | 2 / 986<br>(0.2%)    | 3 / 662<br>(0.5%)    | 3 / 437<br>(0.7%)    | 4 / 1204<br>(0.3%)     | 3 / 674<br>(0.4%)    | 21 / 4989<br>(0.4%)    |
| Morbidly adherent placenta <sup>c</sup>                                                             | 1 / 359<br>(0.3%)    | 0 / 177<br>(0.0%)    | 0 / 490<br>(0.0%)    | 1 / 986<br>(0.1%)    | 3 / 662<br>(0.5%)    | 0 / 437<br>(0.0%)    | 1 / 1204<br>(0.1%)     | 1 / 674<br>(0.1%)    | 7 / 4989<br>(0.1%)     |
| Abruptio <sup>c</sup>                                                                               | 0 / 359<br>(0.0%)    | 1 / 177<br>(0.6%)    | 2 / 491<br>(0.4%)    | 5 / 986<br>(0.5%)    | 2 / 662<br>(0.3%)    | 1 / 437<br>(0.2%)    | 1 / 1204<br>(0.1%)     | 2 / 674<br>(0.3%)    | 14 / 4990<br>(0.3%)    |
| Postpartum haemorrhage requiring transfusion of >1 unit of whole blood or packed cells <sup>c</sup> | 1 / 359<br>(0.3%)    | 2 / 177<br>(1.1%)    | 2 / 491<br>(0.4%)    | 4 / 986<br>(0.4%)    | 3 / 662<br>(0.5%)    | 1 / 437<br>(0.2%)    | 3 / 1204<br>(0.2%)     | 6 / 674<br>(0.9%)    | 22 / 4990<br>(0.4%)    |

|                                                         | <b>Argentina</b>   | <b>Chile</b>      | <b>Ghana</b>      | <b>India – Delhi</b> | <b>India – Vellore</b> | <b>Kenya</b>      | <b>Pakistan</b>    | <b>Sudan</b>      | <b>Totals</b>       |
|---------------------------------------------------------|--------------------|-------------------|-------------------|----------------------|------------------------|-------------------|--------------------|-------------------|---------------------|
| Severe infection within 6 weeks postpartum <sup>c</sup> | 11 / 358<br>(3.1%) | 3 / 177<br>(1.7%) | 2 / 491<br>(0.4%) | 9 / 985<br>(0.9%)    | 7 / 662<br>(1.1%)      | 1 / 437<br>(0.2%) | 9 / 1204<br>(0.7%) | 7 / 674<br>(1.0%) | 49 / 4988<br>(1.0%) |
| Hysterectomy up to 6 weeks postpartum <sup>c</sup>      | 1 / 359<br>(0.3%)  | 0 / 177<br>(0.0%) | 0 / 491<br>(0.0%) | 1 / 986<br>(0.1%)    | 1 / 662<br>(0.2%)      | 1 / 438<br>(0.2%) | 0 / 1204<br>(0.0%) | 1 / 674<br>(0.1%) | 5 / 4991<br>(0.1%)  |

| <b>Table S15 continued</b>                                               |                     |                     |                      |                      |                     |                      |                     |                     |                       |
|--------------------------------------------------------------------------|---------------------|---------------------|----------------------|----------------------|---------------------|----------------------|---------------------|---------------------|-----------------------|
| Manual removal of placenta <sup>e</sup>                                  | 6 / 359<br>(1.7%)   | 0 / 177<br>(0.0%)   | 1 / 491<br>(0.2%)    | 0 / 986<br>(0.0%)    | 1 / 662<br>(0.2%)   | 7 / 438<br>(1.6%)    | 2 / 1204<br>(0.2%)  | 1 / 674<br>(0.1%)   | 18 / 4991<br>(0.4%)   |
| Bladder or bowel damage <sup>j</sup>                                     | 0 / 310<br>(0.0%)   | 0 / 161<br>(0.0%)   | 1 / 345<br>(0.3%)    | 0 / 687<br>(0.0%)    | 2 / 592<br>(0.3%)   | 0 / 382<br>(0.0%)    | 0 / 1096<br>(0.0%)  | 0 / 612<br>(0.0%)   | 3 / 4185<br>(0.1%)    |
| <b><i>CORONIS child(ren)</i></b>                                         |                     |                     |                      |                      |                     |                      |                     |                     |                       |
| <b>Denominator – live born children of women eligible to be assessed</b> | <b>1656</b>         | <b>1210</b>         | <b>1307</b>          | <b>3860</b>          | <b>2178</b>         | <b>1689</b>          | <b>2536</b>         | <b>1662</b>         | <b>16098</b>          |
| Known deaths or serious morbidity of CORONIS child(ren)                  | 82 / 1656<br>(5.0%) | 31 / 1210<br>(2.6%) | 104 / 1307<br>(8.0%) | 201 / 3860<br>(5.2%) | 54 / 2178<br>(2.5%) | 126 / 1689<br>(7.5%) | 96 / 2536<br>(3.8%) | 58 / 1662<br>(3.5%) | 752 / 16098<br>(4.7%) |

<sup>a</sup> Following the CORONIS birth and before any subsequent pregnancy, any new onset or worsening.

<sup>b</sup> Not related to pregnancy.

<sup>c</sup> Excluding diagnostic laparoscopy and diagnostic laparotomy.

<sup>d</sup> Following the CORONIS birth, any new onset.

<sup>e</sup> For the birth following the CORONIS birth

<sup>f</sup> Excludes women pregnant at time of assessment.

<sup>g</sup> Viability could not be assessed if gestational age was not recorded

<sup>h</sup> Excludes stillbirths.

<sup>i</sup> Includes: uterine rupture, uterine scar dehiscence, placenta praevia, morbidly adherent placenta, abruption, postpartum haemorrhage requiring transfusion, severe infection within 6 weeks postpartum, hysterectomy up to 6 weeks postpartum, manual removal of placenta.

<sup>j</sup> At the time of subsequent Caesarean section.

Missing data are <1% unless otherwise stated.
